# Supplementary material for: Weak Pnictogen Bond with Bismuth: Experimental Evidence Based on Bi−P Through‐Space Coupling
Source: PubMed Central journal article supplement — Chemistry. 2019 Feb 25;25(16):4017–24. doi: 10.1002/chem.201900266 (PMC6593703; doi:10.1002/chem.201900266), 2019-02-25
Supplement: CHEM-25-4017-s001.pdf [file CHEM-25-4017-s001.pdf]

# CHEMISTRY

## A **European** Journal

### Supporting Information

#### **Weak Pnictogen Bond with Bismuth: Experimental Evidence Based on Bi–P Through-Space Coupling**

Réka Mokrai,<sup>[a]</sup> Jamie Barrett,<sup>[b]</sup> David C. Apperley,<sup>[b]</sup> Andrei S. Batsanov,<sup>[b]</sup> Zoltán Benkő,<sup>\*[a]</sup> and Dominikus Heift<sup>\*[b]</sup>

chem\_201900266\_sm\_miscellaneous\_information.pdf

- 1. Materials and methods**
- 2. Synthetic procedures of 1 and 2a-c**
- 3. Supplementary solid-state NMR spectra of 2a-c**
- 4. Solution NMR spectra of 1 and 2a-c**
- 5. X-ray structure analyses of 2a-c**
- 6. Computational details**
- 7. Literature**

## **1. Materials and methods**

All reactions were performed using standard Schlenk techniques under a dry nitrogen atmosphere. Sensitive chemicals were stored and weighed in a glove box under nitrogen atmosphere. All solvents were purified and dried by standard methods. All chemical reagents were used without further purification as received from commercial suppliers. The precise concentration of organolithium reagents was determined by titration prior to use. Solution NMR spectra were recorded on Bruker Avance 400 MHz or Varian VNMRS 600 MHz or VNMRS 700 MHz spectrometers. Deuterated solvents were further dried and purified prior to use following standard procedures. Chemical shifts are reported in ppm relative to SiMe<sub>4</sub> and 85% H<sub>3</sub>PO<sub>4</sub> for <sup>1</sup>H, <sup>13</sup>C and <sup>31</sup>P, respectively; Coupling constants are given in Hz. Solid-state NMR spectra were recorded on a 400 MHz Bruker Avance III HD spectrometer. Elemental analyses were performed at the microanalysis laboratory of the Chemistry Department at Durham University and at the Science Centre at London Metropolitan University. X-ray diffraction experiments were carried out at T=120 K on a Bruker 3-circle D8 Venture diffractometer with a PHOTON 100 CMOS area detector, using Mo-K<sub>α</sub> radiation ( $\lambda=0.71073$  Å) from an Incoatec I $\mu$ S microsource with focussing mirrors and a Cryostream (Oxford Cryosystems) open-flow N<sub>2</sub> gas cryostat. The structures were solved by direct methods (SHELXS)<sup>[1]</sup> and refined by full-matrix least squares using SHELXL software<sup>[2]</sup> on OLEX2<sup>[3]</sup> platform.

## 2. Synthetic procedures

### Tri(*o*-meththiomethylphenyl)phosphine ( $P(C_6H_4\text{-}o\text{-}CH_2SCH_3)_3$ (**PS**<sub>3</sub>, **1**))

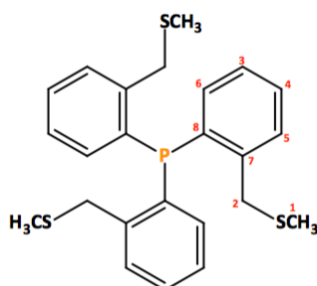

#### A) Synthesis of $P(C_6H_4\text{-}o\text{-}CH_2M)_3$ , $M = Li/K$

Tris (*o*-tolyl) phosphine (2.00 g, 6.58 mmol) and KO<sup>t</sup>Bu (2.21 g, 19.7 mmol) were combined in hexane (40 mL) forming a cloudy suspension. *n*-BuLi (2.5 M in hexane, 11.2 mL, 26.3 mmol) was added dropwise at room temperature forming a deep red suspension, which was left to stir overnight at room temperature. The supernatant liquid was removed by cannula filtration and the obtained red solid was washed with toluene (3 × 50 mL) and dried *in vacuo*. This slightly pyrophoric material is insoluble in non-polar solvents (*e.g.* hexane, toluene) and reacts with polar solvents (*e.g.* THF, dichloromethane, chloroform), thus analysis by NMR spectroscopy was not possible and the solid was directly employed as starting material for the next step.

#### B) Synthesis of $P(C_6H_4\text{-}o\text{-}CH_2SCH_3)_3$ (**PS**<sub>3</sub>)

Dimethyl disulfide (17.4 mL, 980 mmol) was added dropwise at  $-78\text{ }^\circ\text{C}$  to a suspension of the metallated phosphane precursor (8.21 g, see part A) in toluene (50 mL). After stirring the reaction mixture for 2 h at  $-78\text{ }^\circ\text{C}$ , the cooling bath was removed and the reaction mixture was stirred for 15 h at room temperature.

The reaction mixture was hydrolysed with water (20 mL) and the crude product was extracted with Et<sub>2</sub>O (3 × 50 mL). The combined organic phases were washed with brine and dried over MgSO<sub>4</sub>. The crude product (yellow oil) was purified by column chromatography (eluent: toluene) to yield the final product PS<sub>3</sub> as a colourless solid (3.10 g). Yield: 36% (calculated for step B assuming composition of precursor to be PK<sub>3</sub>). R<sub>f</sub> = 0.85: mono-substituted product, R<sub>f</sub> = 0.68: bis-substituted product and R<sub>f</sub> = 0.42: tri-substituted product (**1**, PS<sub>3</sub>).

$^{31}\text{P}\{^1\text{H}\}$  NMR (243 MHz;  $\text{CDCl}_3$ , 298 K):  $\delta$  (ppm) =  $-36.6$  (s);

$^{13}\text{C}$  NMR (151 MHz;  $\text{CDCl}_3$ , 298 K):  $\delta$  (ppm) =  $15.4$  (d,  $^5J_{\text{PC}} = 1.5$  Hz, (1)),  $36.9$  (d,  $^3J_{\text{PC}} = 24.5$  Hz, (2)),  $127.3$  (s, (3)),  $129.0$  (s, (4)),  $129.7$  (d,  $^3J_{\text{PC}} = 5.0$  Hz, (5)),  $134.4$  (s, (6)),  $135.2$  (d,  $^2J_{\text{PC}} = 12.0$  Hz, (7)),  $142.7$  (d,  $^1J_{\text{PC}} = 25.5$  Hz, (8));

$^1\text{H}$  NMR (600 MHz;  $\text{CDCl}_3$ , 298 K):  $\delta$  (ppm) =  $2.03$  (9H, s, (1)),  $3.95$  (6H, s, (2)),  $6.79$ - $6.83$  (3H, m, (6)),  $7.11$ - $7.16$  (3H, m, (3)),  $7.30$ - $7.35$  (3H, m, (4)),  $7.45$  (3H, m, (5));

$^{31}\text{P}\{^1\text{H}\}$  NMR (243 MHz;  $\text{C}_6\text{D}_6$ , 298 K):  $\delta$  (ppm) =  $-36.9$  (s);

$^{13}\text{C}$  NMR (176 MHz;  $\text{C}_6\text{D}_6$ , 298 K):  $\delta$  (ppm) =  $15.4$  (d,  $^5J_{\text{PC}} = 1.6$  Hz, (1)),  $37.4$  (d,  $^3J_{\text{PC}} = 24.6$  Hz, (2));

$^1\text{H}$  NMR (700 MHz;  $\text{C}_6\text{D}_6$ , 298 K):  $\delta$  (ppm) =  $1.79$  (9H, s, (1)),  $3.93$  (6H, s, (2));

Elemental analysis % (calc. %)  $\text{C}_{24}\text{H}_{27}\text{P}_1\text{S}_3$ : C 64.71 (65.12), 6.14 (6.15).

For a previously reported synthesis of **1** see<sup>[4]</sup>. Repetition of this procedure from  $\text{PCl}_3$  and the organolithium derivative of *o*-bromo benzyl methyl sulfide delivered a mixture of products in the  $^{31}\text{P}$  NMR spectrum.

### Synthesis of $[\text{PS}_3\text{BiCl}_3]$ **2a**

A solution of  $\text{P}(\text{o-CH}_3\text{SCH}_2\text{C}_6\text{H}_4)_3$  (**1**) (0.50 g, 1.130 mmol) in toluene (5 mL) was added dropwise at room temperature to a suspension of  $\text{BiCl}_3$  (0.32 g, 1.102 mmol) in toluene (5 mL). The reaction mixture was stirred for 30 minutes at room temperature forming a yellow suspension. After filtration, the isolated solid was washed with hexane (20 mL) and dried *in vacuo*, delivering the final product as a pale yellow solid (0.581 g, 76%). The synthesis can alternatively be performed in THF. Single crystals suitable for X-ray diffraction analysis were obtained from a concentrated solution of the yellow solid in MeCN.

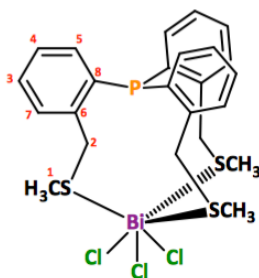

$^{31}\text{P}\{^1\text{H}\}$  NMR (243 MHz;  $\text{C}_6\text{D}_6$ , 298 K):  $\delta$  (ppm) =  $-37.0$  (br s).

CP-MAS  $^{31}\text{P}$ -NMR (162 MHz; 6 kHz spin-rate, 256 K):  $\delta$  (ppm) =  $-37.0$  (dectet,  $J_{\text{TSC}} = 2560$  Hz);

For more details on the solid-state  $^{31}\text{P}$ -NMR study see section below in this document.

$^1\text{H}$  NMR (700 MHz;  $\text{C}_6\text{D}_6$ , 298 K):  $\delta$  (ppm) =  $1.95$  (9H, s, (1)),  $3.71$  (6H, s, (2)),  $6.79$ - $6.82$  (3H, m, (3)),  $6.88$ - $6.91$  (3H, m, (7)),  $6.94$  -  $6.97$  (3H, m, (4)),  $7.06$  -  $7.09$  (3H, m, (5));

$^{13}\text{C}$  NMR (176 MHz;  $\text{C}_6\text{D}_6$ , 298 K):  $\delta$  (ppm) = 16.5 (s, (1)), 37.7 (d,  $^3J_{\text{PC}} = 21$  Hz, (2)), 127.5 (s, (3)), 129.4 (s, (4)), 130.5 (d,  $^2J_{\text{PC}} = 5.5$  Hz, (5)), 134.2 (d,  $^2J_{\text{PC}} = 9.5$  Hz, (6)), 134.3 (s, (7)), 142.5 (d,  $^1J_{\text{PC}} = 25.5$  Hz, (8));

Peak position of C3 (under solvent signal) can be identified from the HSQC NMR spectrum.

Elemental analysis % (calc. %)  $\text{BiCl}_3\text{C}_{24}\text{H}_{27}\text{P}_1\text{S}_3$ : C 39.21 (38.03), H 3.71 (3.59).

The low carbon value is presumably due to trace amounts of non-combustible solid residues.

### Synthesis of $[\text{PS}_3\text{BiBr}_3]$ 2b

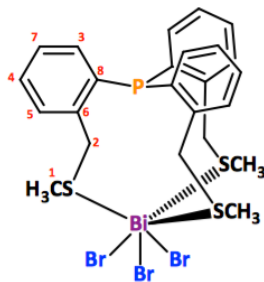

A solution of  $\text{P}(o\text{-CH}_3\text{SCH}_2\text{C}_6\text{H}_4)_3$  (**1**) (0.50 g, 1.130 mmol) in toluene (5 mL) was added dropwise at room temperature to a suspension of  $\text{BiBr}_3$  (0.46 g, 1.020 mmol) in toluene (5 mL). The reaction mixture was subsequently stirred for 1 hour at room temperature to form a yellow suspension. Hexane was added to complete the precipitation of the product, which was filtered off, washed with hexane (20 mL) and dried *in vacuo*, delivering the final product as a pale yellow solid (0.485 g, 53%). The synthesis can alternatively be performed in THF. Single crystals suitable for X-ray diffraction analysis were obtained from a concentrated solution of the yellow solid in MeCN.

$^{31}\text{P}\{^1\text{H}\}$  NMR (243 MHz;  $\text{C}_6\text{D}_6$ , 298 K):  $\delta$  (ppm) =  $-38.7$  (br s).

$^1\text{H}$  NMR (600 MHz;  $\text{C}_6\text{D}_6$ , 298 K):  $\delta$  (ppm) = 2.06 (9H, s, (1)), 3.74 (6H, s, (2)), 6.83-6.87 (3H, m, (3)), 6.92 - 6.95 (3H, m, (7)), 6.98-7.02 (3H, m, (4)), 7.08 - 7.11 (3H, m, (5));

$^{13}\text{C}$  NMR (151 MHz;  $\text{C}_6\text{D}_6$ , 298 K):  $\delta$  (ppm) = 17.5 (s, (1)), 38.4 (d,  $^3J_{\text{PC}} = 20.0$  Hz, (2)), 127.9 (s, (3)), 129.9 (s, (4)), 131.0 (d,  $^3J_{\text{PC}} = 5.5$  Hz, (5)), 134.2 (d,  $^2J_{\text{PC}} = 9.0$  Hz, (6)), 134.6 (s, (7)), 142.9 (d,  $^1J_{\text{PC}} = 25.0$  Hz, (8));

Peak position of C3 (under solvent signal) can be identified from the HSQC NMR spectrum.

Elemental analysis % (calc. %)  $\text{BiBr}_3\text{C}_{24}\text{H}_{27}\text{P}_1\text{S}_3$ : C 32.15 (32.34), H 3.03 (3.05).

### Synthesis of $[\text{PS}_3\text{BiI}_3]$ 2c

A solution of  $\text{P}(o\text{-CH}_3\text{SCH}_2\text{C}_6\text{H}_4)_3$  (**1**) (0.13 g, 0.294 mmol) in THF (5 mL) was added dropwise at room temperature to a solution of  $\text{BiI}_3$  (0.17 g, 0.294 mmol) in THF (5 mL). The reaction mixture was stirred for 15 hour at room temperature. Subsequently, the solvent was removed under reduced pressure

yielding a violet solid, which was dried in *in vacuo* (0.210 g, 70%). Single crystals suitable for X-ray diffraction analysis were obtained from a concentrated solution of the solid in MeCN.

$^{31}\text{P}\{^1\text{H}\}$  NMR (162 MHz;  $\text{C}_6\text{D}_6$ , 298 K):  $\delta$  (ppm) =  $-39.2$  (s);

$^1\text{H}$  NMR (400 MHz;  $\text{C}_6\text{D}_6$ , 298 K):  $\delta$  (ppm) = 1.87 (9H, s), 3.87 (6H, s), 6.9-6.85 (3  $\text{H}_{\text{arom}}$ , m), 7.06 - 6.99 (6  $\text{H}_{\text{arom}}$ , m), 7.29 - 7.24 (3  $\text{H}_{\text{arom}}$ , m);

$^{13}\text{C}$  NMR (100 MHz;  $\text{C}_6\text{D}_6$ , 298 K):  $\delta$  (ppm) = 15.7 (s, 3  $\text{CH}_3$ ), 37.5 (d,  $^3J_{\text{PC}} = 24.4$  Hz, 3  $\text{CH}_2$ ), 127.6 (s, 1  $\text{C}_{\text{arom}}$ ), 129.4 (s, 1  $\text{C}_{\text{arom}}$ ), 130.3 (d,  $J_{\text{PC}} = 4.9$  Hz, 1  $\text{C}_{\text{arom}}$ ), 134.9 (s, 1  $\text{C}_{\text{arom}}$ ), 135.3 (s, 1  $\text{C}_{\text{arom}}$ ), 143.5 (d,  $J_{\text{PC}} = 25.2$  Hz, 1  $\text{C}_{\text{arom}}$ ).

Elemental analysis % (calc. %)  $\text{BiI}_3\text{C}_{24}\text{H}_{27}\text{P}_1\text{S}_3$ : C 28.04 (27.92), H 2.68 (2.64).

### 3. Supplementary solid-state NMR spectra

#### Comparing P-Bi atom distances with peak widths of resonances of solid-state $^{31}\text{P}$ NMR spectra

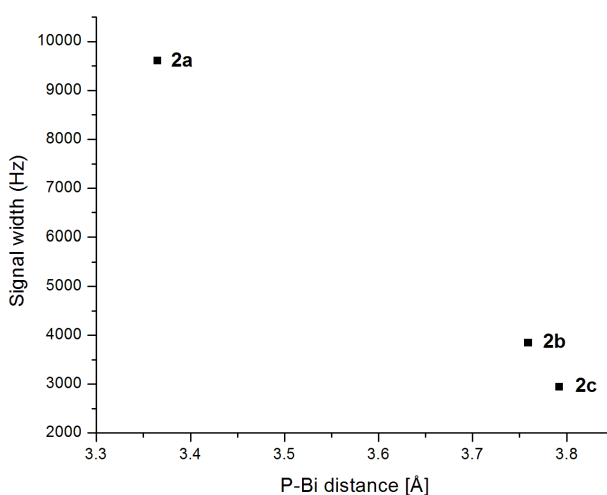

Figure S1: Almost linear correlation between the peak widths of solid-state  $^{31}\text{P}$  NMR resonances of compounds **2** vs. the crystallographic P–Bi atom distances, illustrating their dependence on each other.

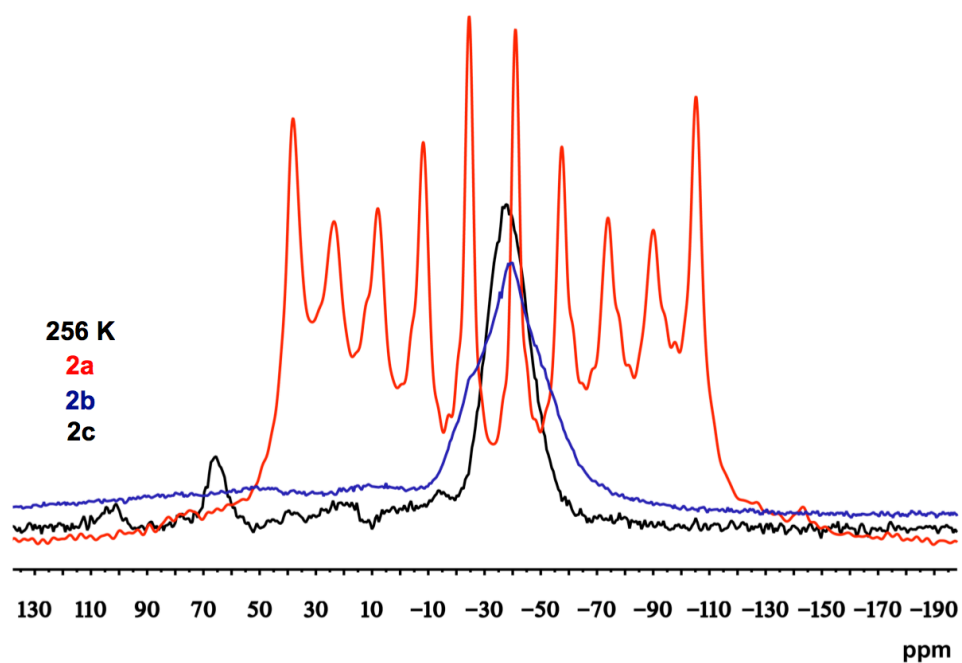

Figure S2:  $^{31}\text{P}$  CP-MAS NMR spectra of solid samples of **2a** (red), **2b** (blue) and **2c** (black) measured at 256 K with spin rates of 6 kHz. **2c** contains an impurity at 65 ppm.

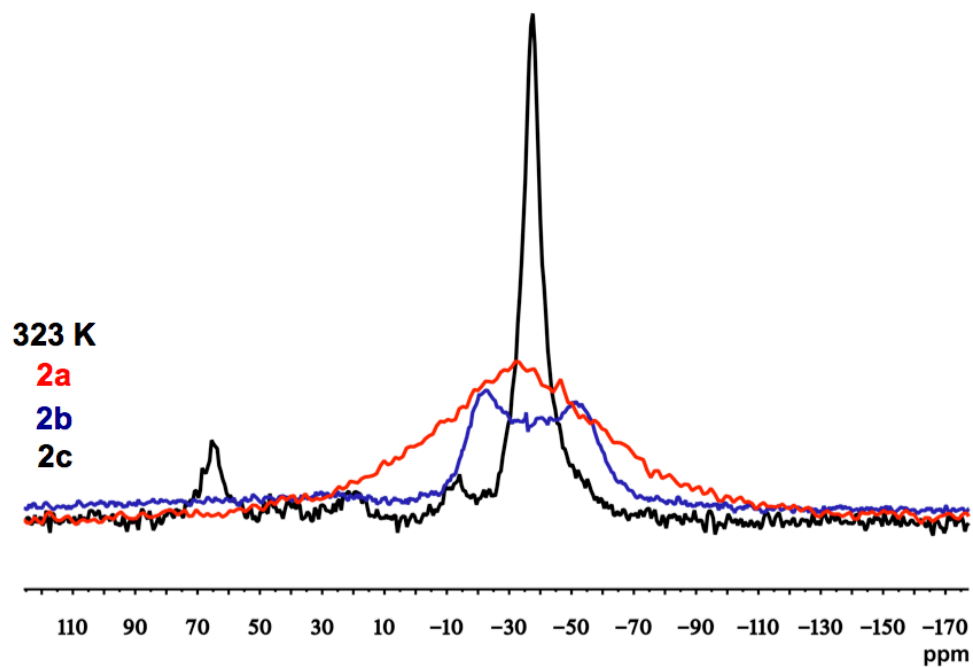

Figure S3:  $^{31}\text{P}$  CP-MAS NMR spectra of solid samples of **2a** (red), **2b** (blue) and **2c** (black) measured at 323 K with spin rates of 6 kHz. **2c** contains an impurity at 65 ppm.

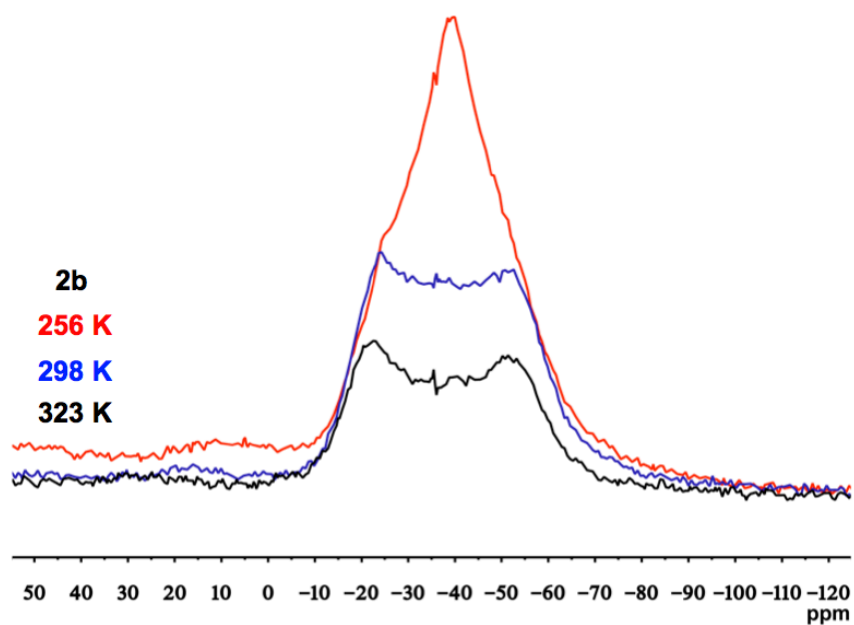

Figure S4: <sup>31</sup>P CP-MAS NMR spectrum of a solid sample of **2b** measured at 256 K (red), 298 K (blue) and 323 K (black) with spin rates of 6 kHz.

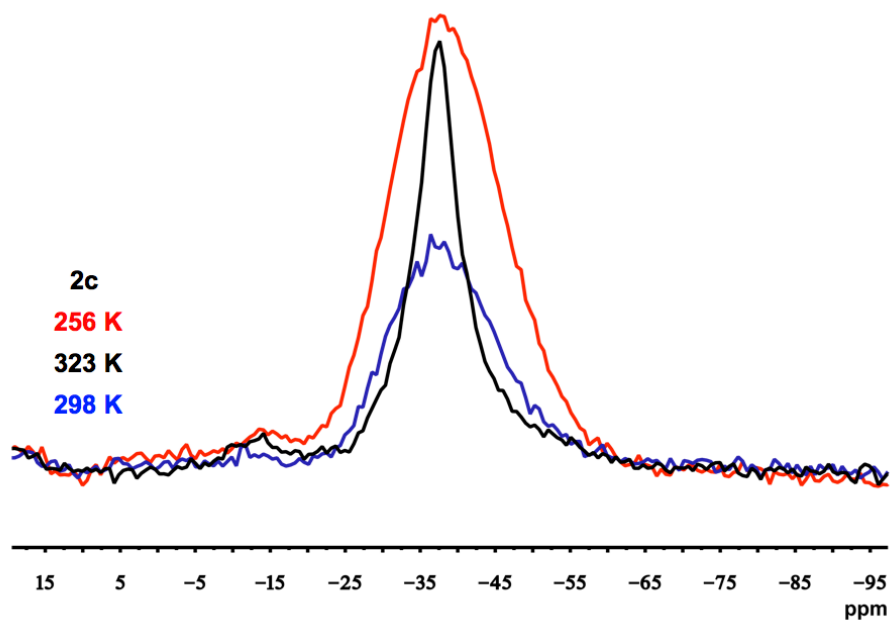

Figure S5: <sup>31</sup>P CP-MAS NMR spectrum of a solid sample of **2c** measured at 256 K, 298 K and 323 K with spin rates of 6 kHz.



## 4. Solution NMR spectra of 1 and 2a-c

### 4.1 Solution NMR spectra of 1 (PS<sub>3</sub>)

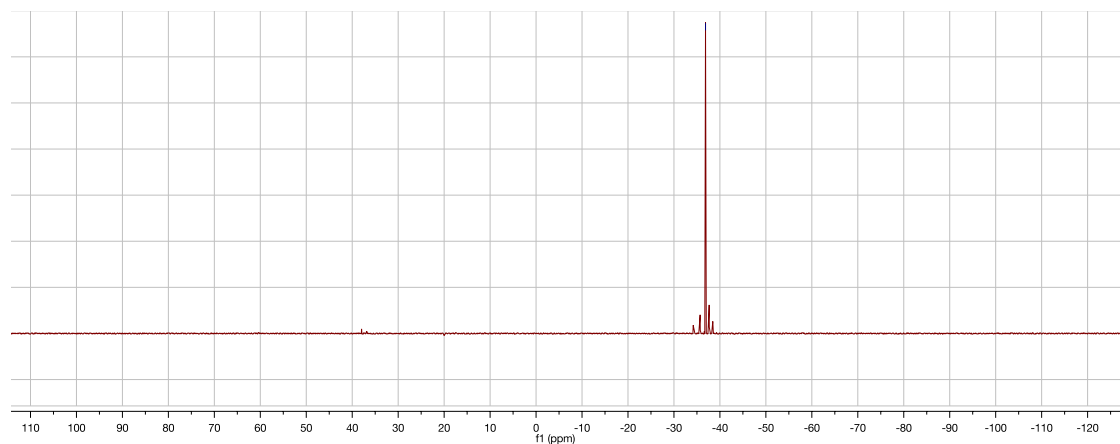

Figure S6: <sup>31</sup>P {<sup>1</sup>H} NMR spectrum of 1 (243 MHz; C<sub>6</sub>D<sub>6</sub>, 298 K).

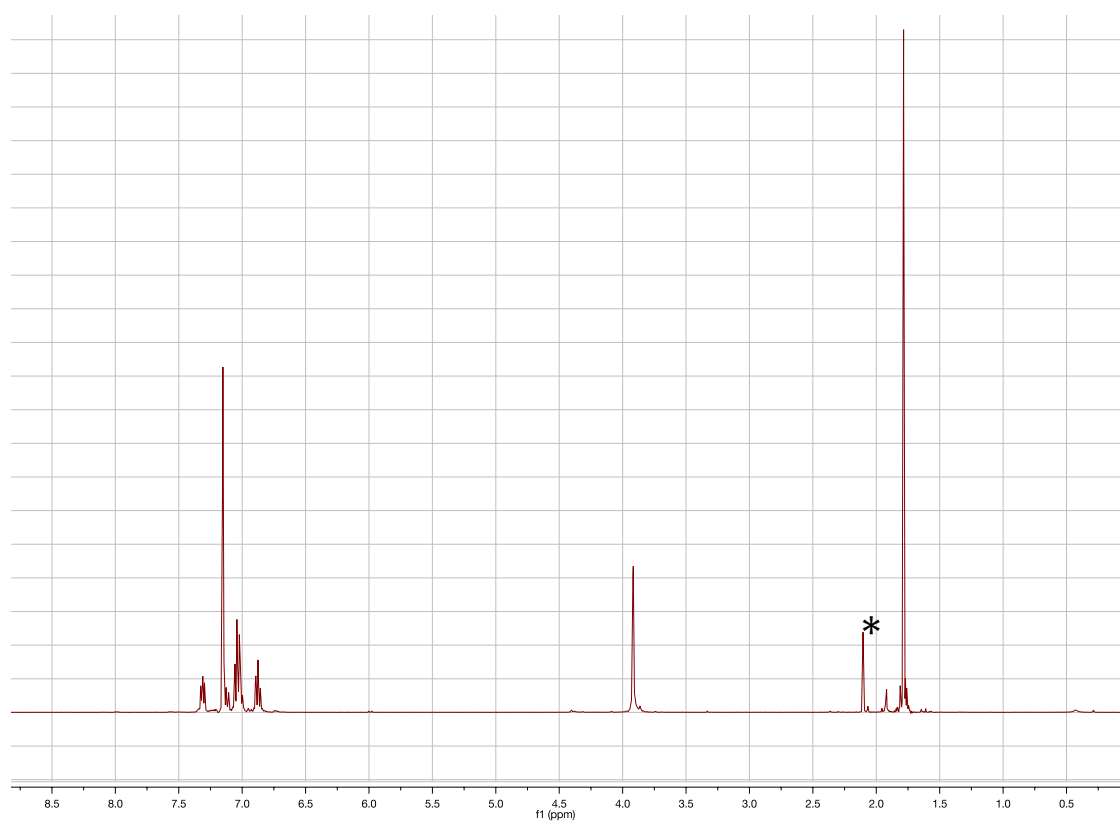

Figure S7: <sup>1</sup>H NMR spectrum of 1 (700 MHz; C<sub>6</sub>D<sub>6</sub>, 298 K). The sample contains traces of toluene, peaks marked with \* and in the aromatic region.

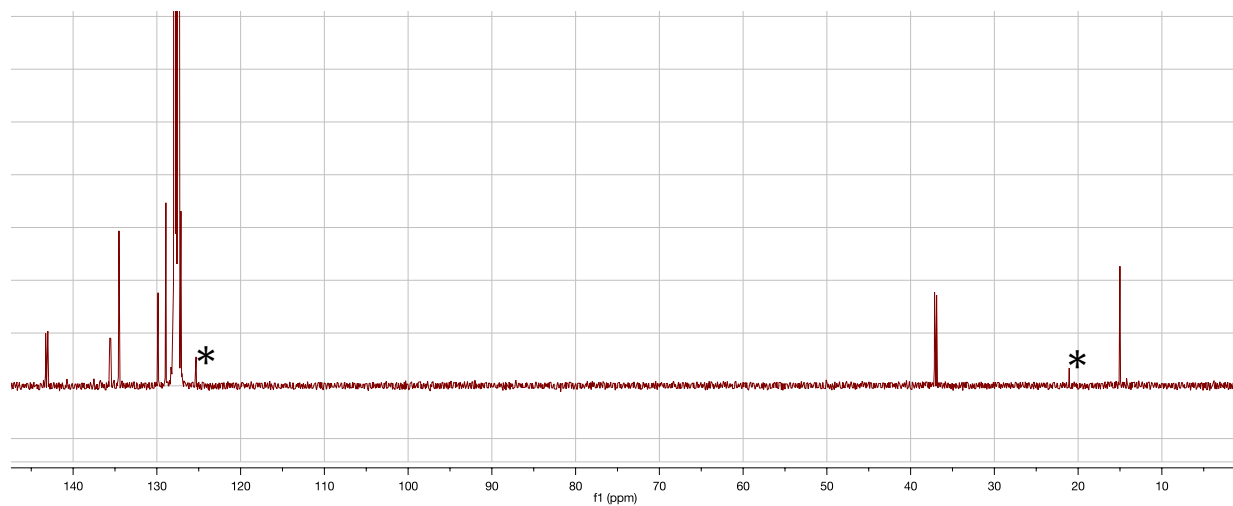

Figure S8:  $^{13}\text{C}$  NMR spectrum of **1** (176 MHz;  $\text{C}_6\text{D}_6$ , 298 K). The sample contains traces of toluene, peaks marked with \*.  $\text{C}_6\text{D}_6$  signal cut off.

## 4.2 Solution NMR spectra of **2a**

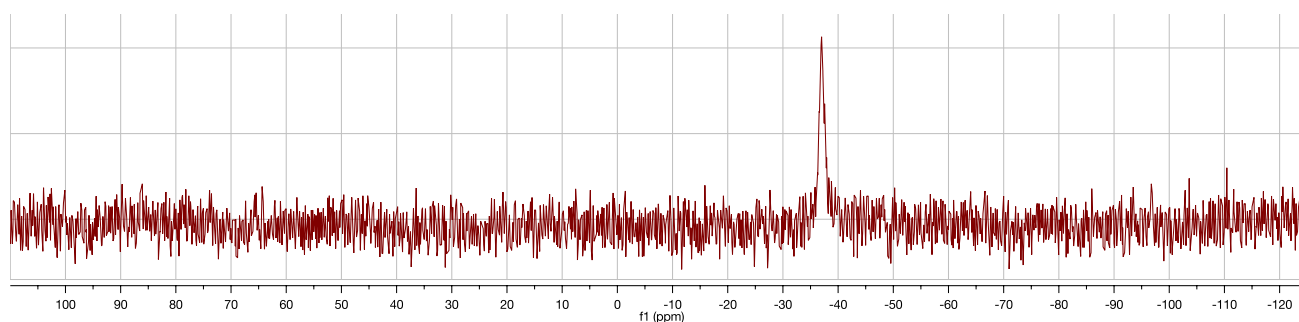

Figure S9:  $^{31}\text{P}\{^1\text{H}\}$  NMR spectrum of **2a** (243 MHz;  $\text{C}_6\text{D}_6$ , 298 K).

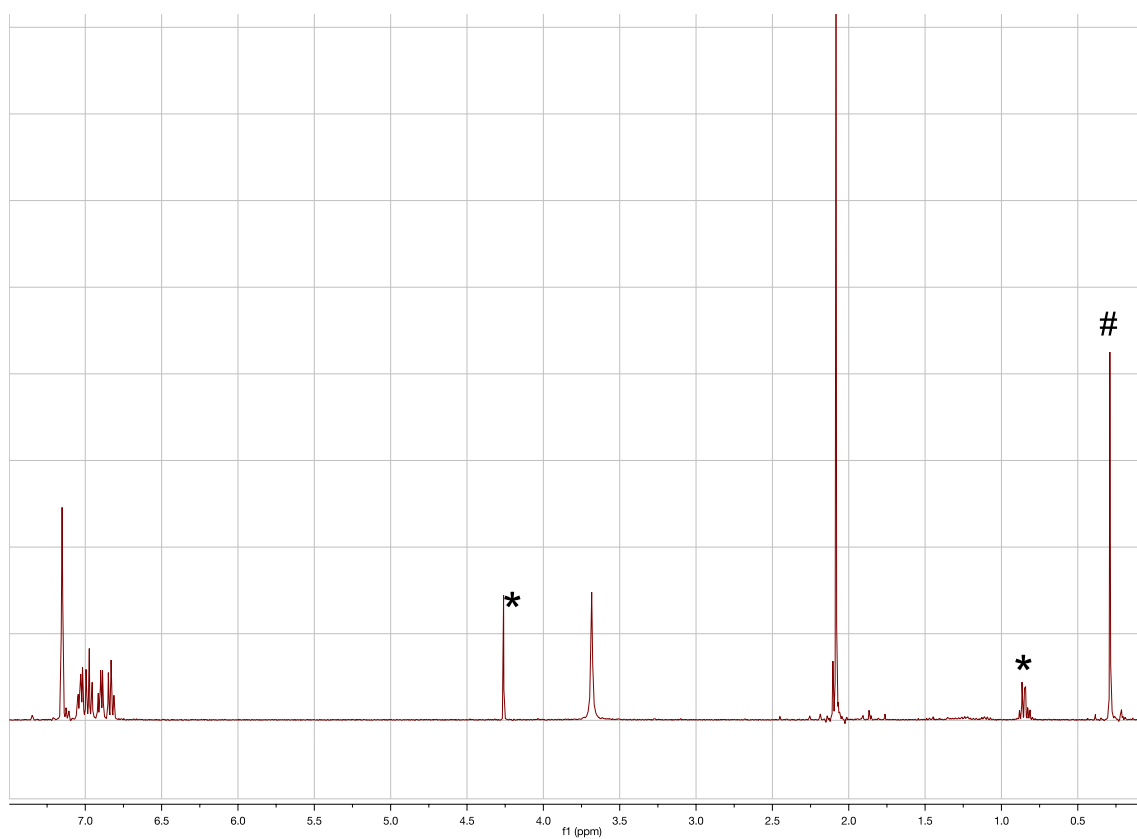

Figure S10:  $^1\text{H}$  NMR spectrum of **2a** (700 MHz;  $\text{C}_6\text{D}_6$ , 298 K). Peaks corresponding to unknown impurity (likely from a plastic syringe) marked with \*, grease impurity marked with #.

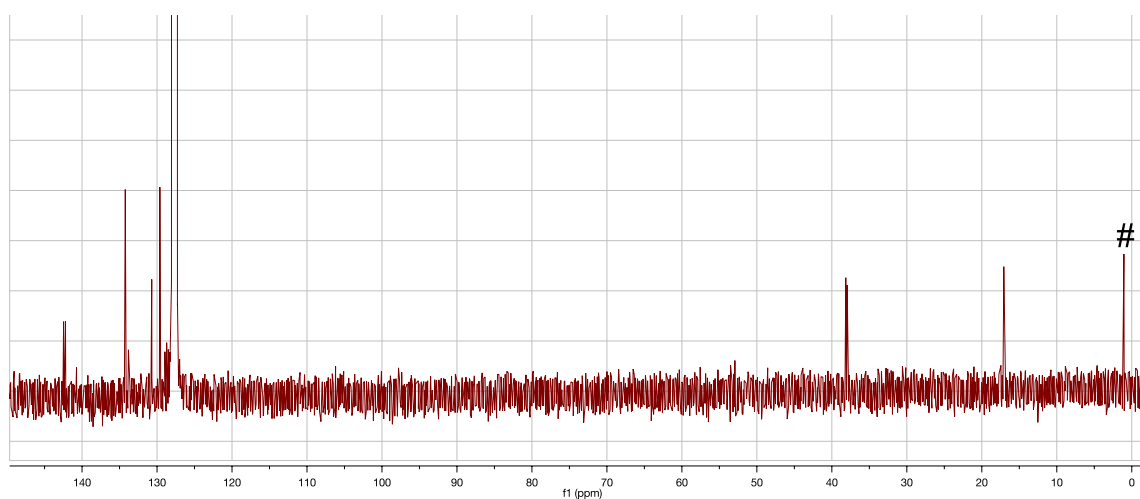

Figure S11:  $^{13}\text{C}$  NMR spectrum of **2a** (176 MHz;  $\text{C}_6\text{D}_6$ , 298 K). Grease impurity marked with #.  $\text{C}_6\text{D}_6$  signal cut off.

### 4.3 Solution NMR spectra of **2b**

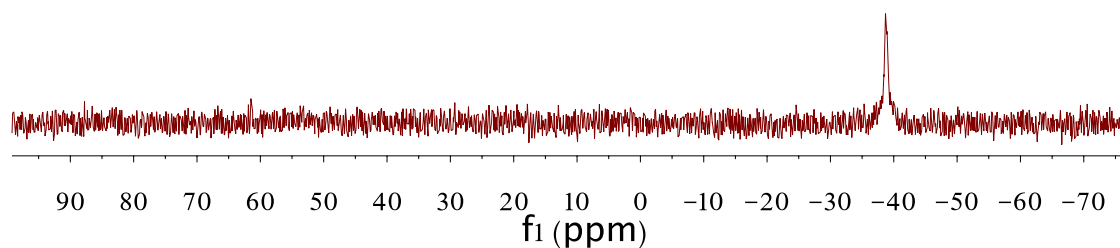

Figure S12:  $^{31}\text{P}\{^1\text{H}\}$  NMR spectrum of **2b** (243 MHz;  $\text{C}_6\text{D}_6$ , 298 K).

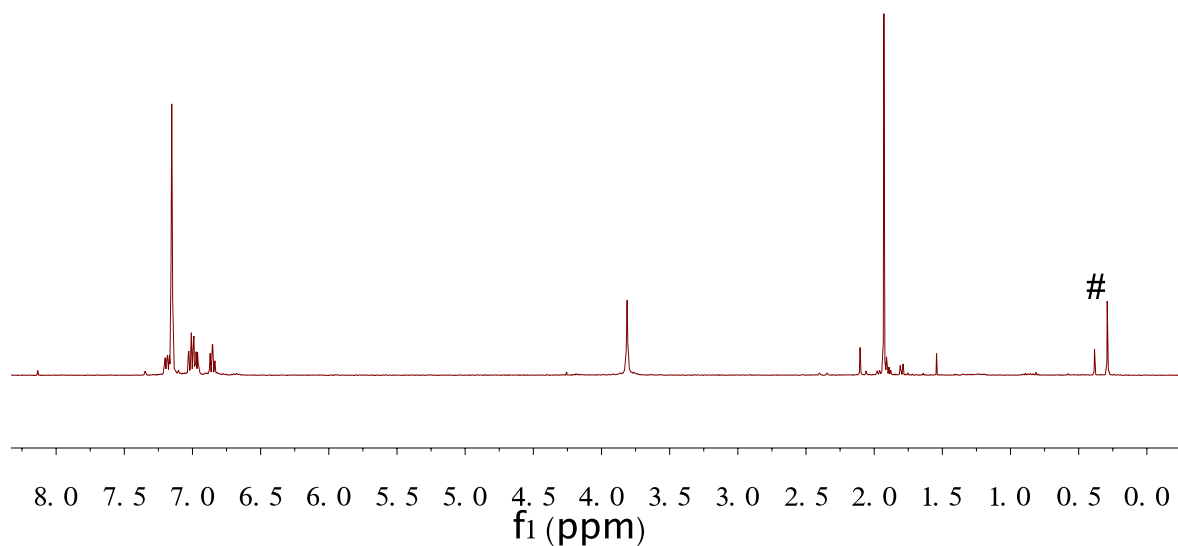

Figure S13:  $^1\text{H}$  NMR spectrum of **2b** (600 MHz;  $\text{C}_6\text{D}_6$ , 298 K). Grease impurity marked with #.

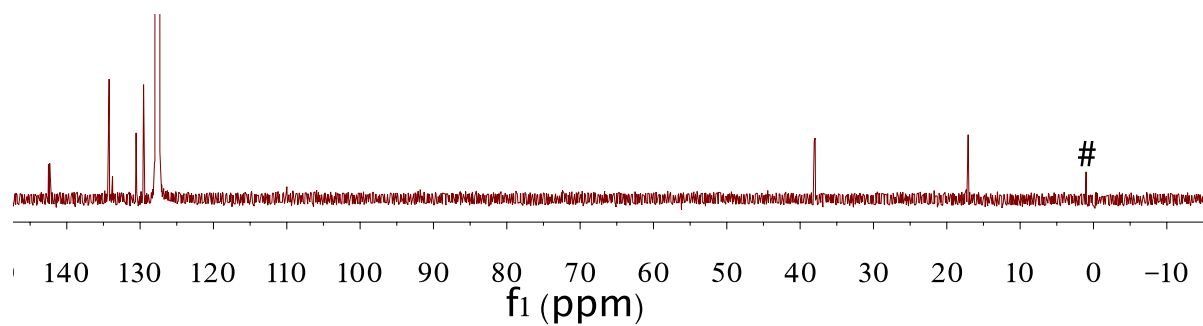

Figure S14:  $^{13}\text{C}$  NMR spectrum of **2b** (151 MHz;  $\text{C}_6\text{D}_6$ , 298 K). Grease impurity marked with #.  $\text{C}_6\text{D}_6$  signal cut off.

## 4.4 Solution NMR spectra of **2c**

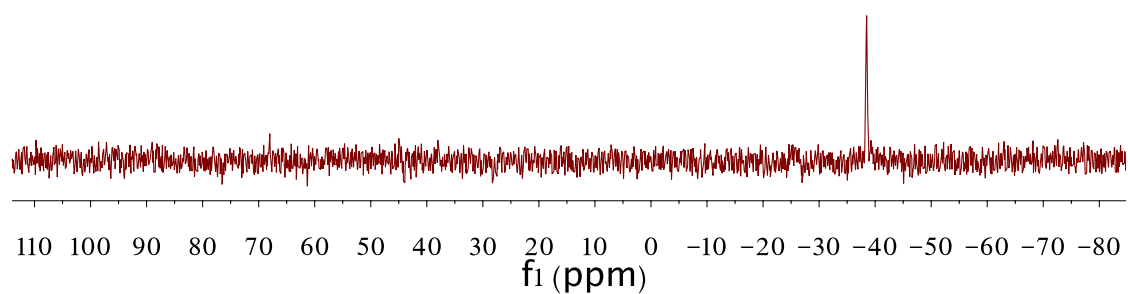

Figure S15:  $^{31}\text{P}\{^1\text{H}\}$  NMR spectrum of **2c** (162 MHz;  $\text{C}_6\text{D}_6$ , 298 K).

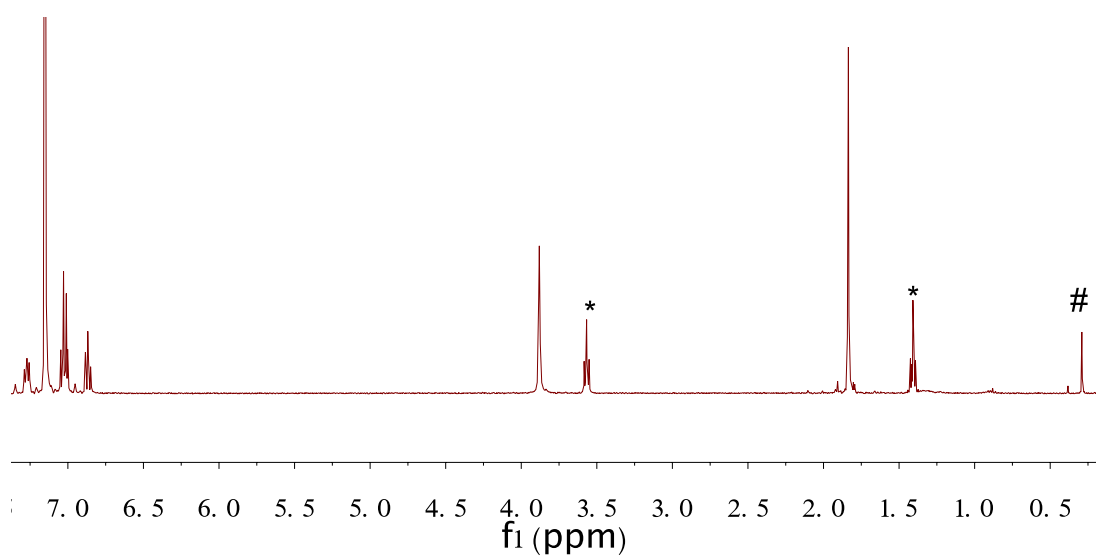

Figure S16:  $^1\text{H}$  NMR spectrum of **2c** (400 MHz;  $\text{C}_6\text{D}_6$ , 298 K). The sample contains traces of THF (\*) and grease (#).  $\text{C}_6\text{D}_6$  signal cut off.

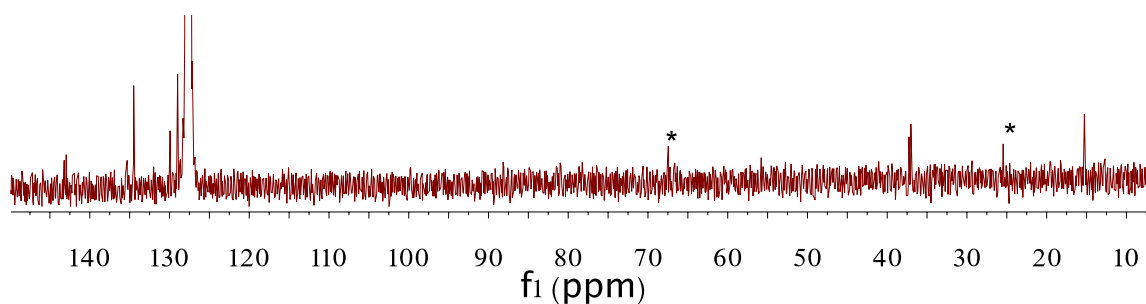

Figure S17:  $^{13}\text{C}$  NMR spectrum of **2c** (100 MHz;  $\text{C}_6\text{D}_6$ , 298 K). The sample contains traces of THF (\*).  $\text{C}_6\text{D}_6$  signal cut off.

## 5. X-ray structure analyses

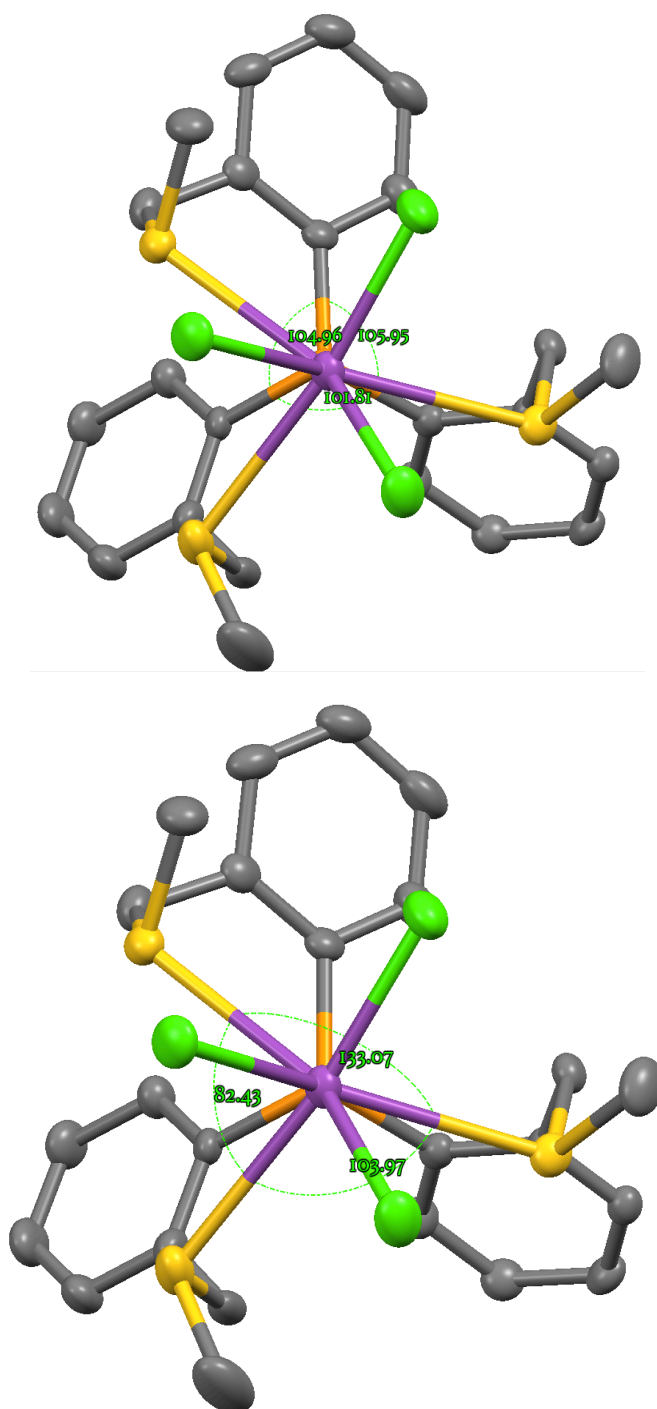

Figure S18: X-ray structure of **2a**, view along the Bi-P axis. Top: Angles around the P atom illustrating the symmetric geometry around the P centre. Bottom: Angles around the Bi atom illustrating the asymmetric geometry around the Bi centre.

|                                             |                                                                   |
|---------------------------------------------|-------------------------------------------------------------------|
| Identification code                         | CCDC 1869085                                                      |
| Empirical formula                           | C <sub>24</sub> H <sub>27</sub> BiCl <sub>3</sub> PS <sub>3</sub> |
| Formula weight                              | 757.93                                                            |
| Temperature/K                               | 120                                                               |
| Crystal system                              | monoclinic                                                        |
| Space group                                 | P2 <sub>1</sub> /c                                                |
| a/Å                                         | 16.5636(8)                                                        |
| b/Å                                         | 12.1392(6)                                                        |
| c/Å                                         | 14.5910(7)                                                        |
| α/°                                         | 90                                                                |
| β/°                                         | 109.0940(16)                                                      |
| γ/°                                         | 90                                                                |
| Volume/Å <sup>3</sup>                       | 2772.4(2)                                                         |
| Z                                           | 4                                                                 |
| ρ <sub>calc</sub> /cm <sup>3</sup>          | 1.816                                                             |
| μ/mm <sup>-1</sup>                          | 6.945                                                             |
| F(000)                                      | 1472.0                                                            |
| Crystal size/mm <sup>3</sup>                | 0.108 × 0.108 × 0.079                                             |
| Radiation                                   | MoKα (λ = 0.71073)                                                |
| 2θ range for data collection/°              | 4.47 to 61.014                                                    |
| Index ranges                                | -23 ≤ h ≤ 23, -17 ≤ k ≤ 17, -20 ≤ l ≤ 20                          |
| Reflections collected                       | 83475                                                             |
| Independent reflections                     | 8458 [R <sub>int</sub> = 0.0660, R <sub>sigma</sub> = 0.0383]     |
| Data/restraints/parameters                  | 8458/0/295                                                        |
| Goodness-of-fit on F <sup>2</sup>           | 1.114                                                             |
| Final R indexes [I ≥ 2σ (I)]                | R <sub>1</sub> = 0.0466, wR <sub>2</sub> = 0.1031                 |
| Final R indexes [all data]                  | R <sub>1</sub> = 0.0660, wR <sub>2</sub> = 0.1099                 |
| Largest diff. peak/hole / e Å <sup>-3</sup> | 3.92/-2.39                                                        |

| <b>Table S2 Crystal data and structure refinement for [PS<sub>3</sub>BiBr<sub>3</sub>] 2b</b> |                                                                   |
|-----------------------------------------------------------------------------------------------|-------------------------------------------------------------------|
| Identification code                                                                           | CCDC 1869086                                                      |
| Empirical formula                                                                             | C <sub>24</sub> H <sub>27</sub> BiBr <sub>3</sub> PS <sub>3</sub> |
| Formula weight                                                                                | 891.31                                                            |
| Temperature/K                                                                                 | 120.0                                                             |
| Crystal system                                                                                | monoclinic                                                        |
| Space group                                                                                   | C2/c                                                              |
| a/Å                                                                                           | 22.6375(10)                                                       |
| b/Å                                                                                           | 13.2290(6)                                                        |
| c/Å                                                                                           | 19.4080(8)                                                        |
| α/°                                                                                           | 90                                                                |
| β/°                                                                                           | 92.6399(18)                                                       |
| γ/°                                                                                           | 90                                                                |
| Volume/Å <sup>3</sup>                                                                         | 5806.0(4)                                                         |
| Z                                                                                             | 8                                                                 |
| ρ <sub>calc</sub> /cm <sup>3</sup>                                                            | 2.039                                                             |
| μ/mm <sup>-1</sup>                                                                            | 10.486                                                            |
| F(000)                                                                                        | 3376.0                                                            |
| Crystal size/mm <sup>3</sup>                                                                  | 0.28 × 0.23 × 0.15                                                |
| Radiation                                                                                     | MoKα (λ = 0.71073)                                                |
| 2θ range for data collection/°                                                                | 4.182 to 59.998                                                   |
| Index ranges                                                                                  | -31 ≤ h ≤ 31, -18 ≤ k ≤ 18, -27 ≤ l ≤ 27                          |
| Reflections collected                                                                         | 46844                                                             |
| Independent reflections                                                                       | 8465 [R <sub>int</sub> = 0.0468, R <sub>sigma</sub> = 0.0363]     |
| Data/restraints/parameters                                                                    | 8465/0/292                                                        |
| Goodness-of-fit on F <sup>2</sup>                                                             | 1.014                                                             |
| Final R indexes [I ≥ 2σ (I)]                                                                  | R <sub>1</sub> = 0.0266, wR <sub>2</sub> = 0.0491                 |
| Final R indexes [all data]                                                                    | R <sub>1</sub> = 0.0435, wR <sub>2</sub> = 0.0534                 |
| Largest diff. peak/hole / e Å <sup>-3</sup>                                                   | 0.80/-0.96                                                        |



|                                             |                                                                  |
|---------------------------------------------|------------------------------------------------------------------|
| Identification code                         | CCDC 1869087                                                     |
| Empirical formula                           | C <sub>24</sub> H <sub>27</sub> BiI <sub>3</sub> PS <sub>3</sub> |
| Formula weight                              | 1032.28                                                          |
| Temperature/K                               | 120                                                              |
| Crystal system                              | monoclinic                                                       |
| Space group                                 | C2/c                                                             |
| a/Å                                         | 23.1403(13)                                                      |
| b/Å                                         | 13.5350(7)                                                       |
| c/Å                                         | 19.9404(11)                                                      |
| α/°                                         | 90                                                               |
| β/°                                         | 94.303(2)                                                        |
| γ/°                                         | 90                                                               |
| Volume/Å <sup>3</sup>                       | 6227.8(6)                                                        |
| Z                                           | 8                                                                |
| ρ <sub>calc</sub> /g/cm <sup>3</sup>        | 2.202                                                            |
| μ/mm <sup>-1</sup>                          | 8.901                                                            |
| F(000)                                      | 3808.0                                                           |
| Crystal size/mm <sup>3</sup>                | 0.194 × 0.175 × 0.159                                            |
| Radiation                                   | MoKα (λ = 0.71073)                                               |
| 2θ range for data collection/°              | 4.096 to 64.064                                                  |
| Index ranges                                | -34 ≤ h ≤ 34, -20 ≤ k ≤ 20, -29 ≤ l ≤ 29                         |
| Reflections collected                       | 76044                                                            |
| Independent reflections                     | 10821 [R <sub>int</sub> = 0.0502, R <sub>sigma</sub> = 0.0357]   |
| Data/restraints/parameters                  | 10821/0/296                                                      |
| Goodness-of-fit on F <sup>2</sup>           | 1.039                                                            |
| Final R indexes [I ≥ 2σ(I)]                 | R <sub>1</sub> = 0.0277, wR <sub>2</sub> = 0.0511                |
| Final R indexes [all data]                  | R <sub>1</sub> = 0.0464, wR <sub>2</sub> = 0.0550                |
| Largest diff. peak/hole / e Å <sup>-3</sup> | 1.40/-1.29                                                       |

## 6. Computational details

The computations were performed with the Gaussian 09 program package<sup>[5a]</sup>, the calculation of indirect spin-spin coupling constants was carried out with the ADF 2014 program.<sup>[5b]</sup> All structures were optimised using the  $\omega$ B97XD and B3LYPD3 functionals, and second order Møller-Plessett perturbational method (MP2). The all valence cc-pVDZ basis set was applied for H, C, P, S, Cl and Br while for Bi and I the cc-pVDZ-PP basis sets were used, which include pseudopotentials for the modelling of relativistic effects. All the basis sets with pseudo potentials were obtained from the EMSL Basis Set Library.<sup>[6]</sup> At each of the optimised structures vibrational analysis was carried out to check that the stationary point located is a minimum of the potential energy hypersurface (no imaginary frequencies were obtained). The Wiberg Bond Indices and NPA charges were calculated with the NBO program version 3.1.<sup>[7]</sup> The AIM and NCI analyses were obtained with the Multiwfn code.<sup>[8]</sup> The molecular orbitals were plotted with Avogadro program.<sup>[9]</sup> The contributions of indirect spin-spin coupling constants have been determined at the PBE1/TZ2P level with scalar ZORA approximation on geometries optimized at  $\omega$ B97XD/cc-pVDZ-PP.

The complex formation energies ( $\Delta_f E(\mathbf{2})$ ) were calculated for the reactions  $\mathbf{1} + \text{BiX}_3 \rightarrow \mathbf{2}$  at different levels of theory. The values for a given complex obtained at the different levels are very similar (see Table S5). The basis set superposition error (BSSE) was estimated using counterpoise correction and the BSSE corrected values follow the same tendencies. The complex formation energies with a model ligand  $\mathbf{1}'$  ( $\Delta_f E(\mathbf{2}')$ ) were also calculated:  $\mathbf{1}'$  arises by the substitution of the P by a CH group. The energy corresponding to the S $\rightarrow$ Bi interaction was estimated from the complex formation energies with ligand  $\mathbf{1}'$ :  $\Delta E_{\text{int}}(\text{S}\rightarrow\text{Bi}) = 1/3 \cdot \Delta_f E(\mathbf{2}')$  from Table S5. The interaction energy for P $\rightarrow$ Bi donation was calculated as the following difference:  $\Delta E_{\text{int}}(\text{S}\rightarrow\text{Bi}) = \Delta_f E(\mathbf{2}') - \Delta_f E(\mathbf{2})$ . These interaction energies show no dependence on the method applied or the BSSE correction.

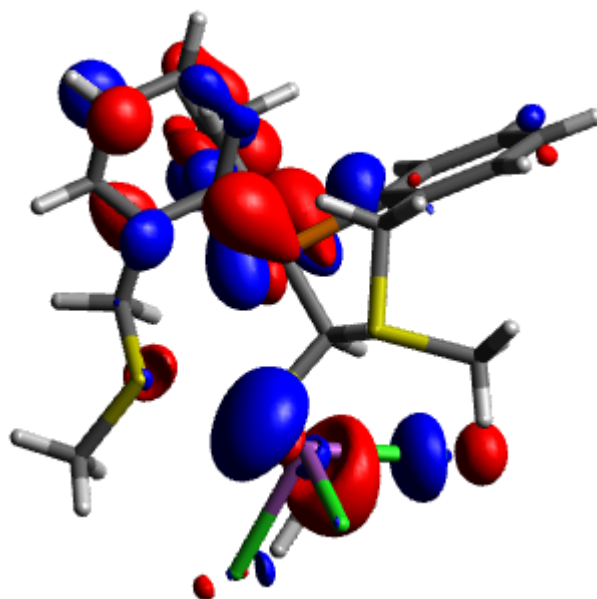

Figure S19: LUMO of **2a** at a contour value of 0.040 a.u. at the  $\omega$ B97XD/cc-pVDZ(-PP) level of theory

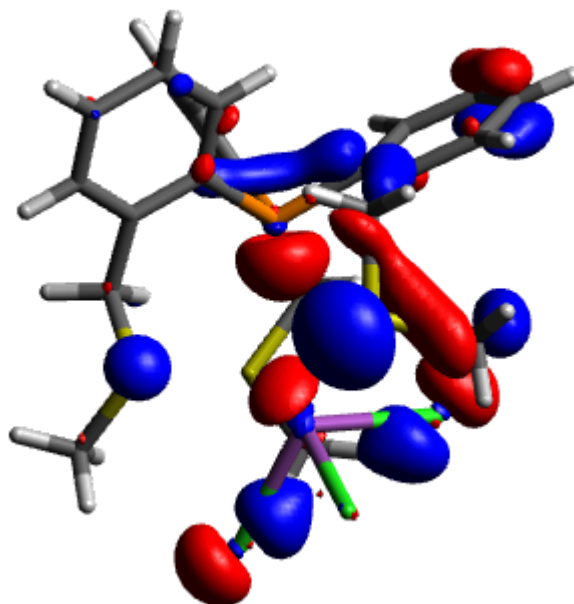

Figure S20: HOMO-16 of **2a** at a contour value of 0.040 a.u. at the  $\omega$ B97XD/cc-pVDZ(-PP) level of theory.

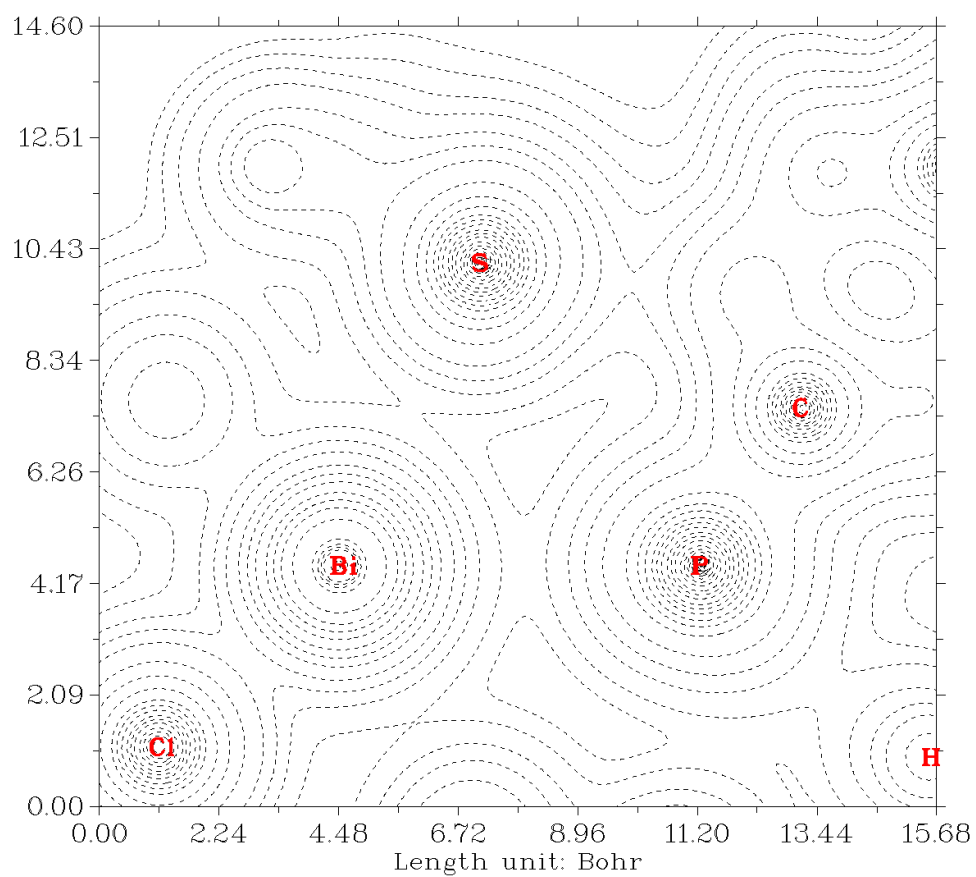

Figure S21: Counter Plot of the Virial field at the  $\omega$ B97XD/cc-pVDZ(-PP) level of theory.

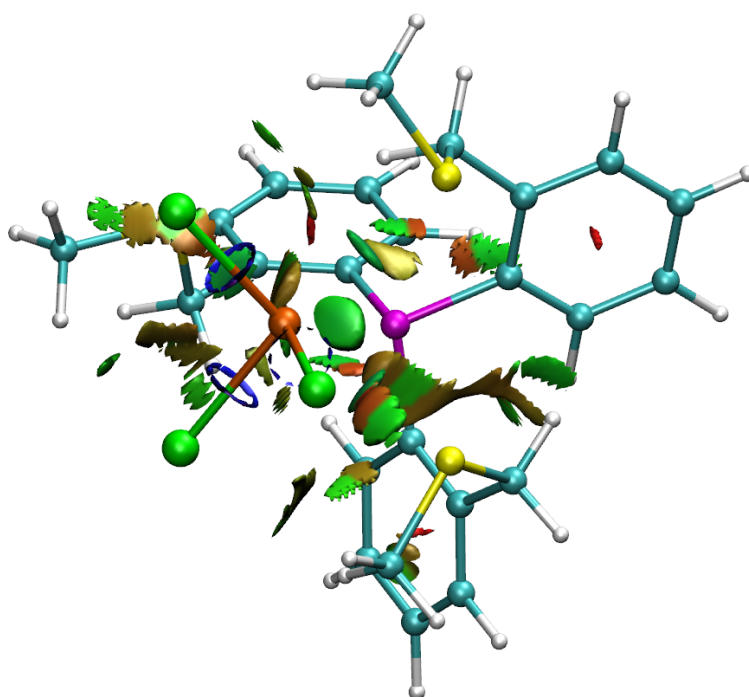

Figure S22: NCI (non-covalent interaction analysis) plot of **2a** at the  $\omega$ B97XD/cc-pVDZ(-PP) level of theory at an RDG value of 0.35. Red and blue areas indicate repulsive and attractive interactions,

respectively. The green disc-shaped domain between the Bi (red) and the P (magenta) atoms indicates a weak interaction.

**Table S4 Bond distances (d, Å) and electron densities at the bond critical points ( $\rho$ , a.u.), Lagrangian kinetic energy (G, a.u.), Hamiltonian kinetic energy at the bond critical point (K, a.u.), Laplacian of electron density at the bond critical point ( $\nabla^2\rho$ , a.u) and potential energy density at the bond critical point (V, a.u.) at Bi–P bond and at Bi–S bonds in complexes 2a-c at  $\omega$ B97XD/cc-pvdz(-PP) level**

| <b>Bi–P bond</b>  |       |        |         |           |                |          |
|-------------------|-------|--------|---------|-----------|----------------|----------|
|                   | d     | $\rho$ | G       | K         | $\nabla^2\rho$ | V        |
| <b>2a</b>         | 3.576 | 0.0131 | 0.00604 | -0.000627 | 0.0267         | -0.00542 |
| <b>2b</b>         | 3.631 | 0.0121 | 0.00547 | -0.000642 | 0.0244         | -0.00482 |
| <b>2c</b>         | 3.732 | 0.0103 | 0.00454 | -0.000640 | 0.0207         | -0.00390 |
| <b>Bi–S bonds</b> |       |        |         |           |                |          |
|                   | d     | $\rho$ | G       | K         | $\nabla^2\rho$ | V        |
| <b>2a</b>         | 3.272 | 0.0198 | 0.00996 | -0.000274 | 0.0409         | -0.00968 |
|                   | 3.232 | 0.0196 | 0.01051 | -0.000442 | 0.0438         | -0.01007 |
|                   | 3.313 | 0.0178 | 0.00913 | -0.000419 | 0.0382         | -0.00871 |
| <b>2b</b>         | 3.250 | 0.0206 | 0.01037 | -0.000209 | 0.0423         | -0.01016 |
|                   | 3.250 | 0.0191 | 0.01016 | -0.000484 | 0.0426         | -0.00968 |
|                   | 3.332 | 0.0173 | 0.00884 | -0.000451 | 0.0372         | -0.00839 |
| <b>2c</b>         | 3.278 | 0.0197 | 0.00984 | -0.000294 | 0.0405         | -0.00955 |
|                   | 3.375 | 0.0162 | 0.00819 | -0.000525 | 0.0349         | -0.00766 |
|                   | 3.315 | 0.0171 | 0.00895 | -0.000619 | 0.0383         | -0.00833 |

**Table S5 Complex formation energies ( $\Delta_f E$ , kcal/mol) for complexes 2a-c and 2'a-c and complex formation Gibbs free energies ( $\Delta_f G$ , kcal/mol) for complexes 2a-c**

|            | $\Delta_f E(\omega B97XD/cc-pvdz(-PP))$ | $\Delta_f E(B3LYPD3/cc-pvdz(-PP))$ | $\Delta_f E(MP2/cc-pvdz(-PP))$ | $\Delta_f G(\omega B97XD/cc-pvdz(-PP))$ |
|------------|-----------------------------------------|------------------------------------|--------------------------------|-----------------------------------------|
| <b>2a</b>  | -32.9/-28.3*                            | -33.6                              | -32.5                          | -16.1                                   |
| <b>2'a</b> | -23.3/-19.5*                            | -23.8                              | -21.7                          | -                                       |
| <b>2b</b>  | -31.9/-27.4*                            | -32.8                              | -33.2                          | -15.8                                   |
| <b>2'b</b> | -23.0/-19.4*                            | -23.7                              | -22.6                          | -                                       |
| <b>2c</b>  | -29.4/-25.9*                            | -30.2                              | -31.7                          | -12.9                                   |
| <b>2'c</b> | -21.6/-18.8*                            | -23.9                              | -22.3                          | -                                       |

\*:Including correction for basis set superposition error (BSSE) using counterpoise correction

| <b>Table S6 Bond distances (<i>d</i>, Å) and Wiberg Bond Indices (WBI, –) for complexes 2a-c</b> |       |                     |       |                      |       |
|--------------------------------------------------------------------------------------------------|-------|---------------------|-------|----------------------|-------|
|                                                                                                  |       | ωB97XD/cc-pvdz(-PP) |       | B3LYPD3/cc-pvdz(-PP) |       |
|                                                                                                  |       | <i>d</i>            | WBI   | <i>d</i>             | WBI   |
| <b>2a</b>                                                                                        | Bi–Cl | 2.537               | 0.651 | 2.567                | 0.657 |
|                                                                                                  | Bi–Cl | 2.562               | 0.616 | 2.595                | 0.616 |
|                                                                                                  | Bi–Cl | 2.566               | 0.615 | 2.598                | 0.616 |
|                                                                                                  | Bi–S  | 3.272               | 0.155 | 3.264                | 0.181 |
|                                                                                                  | Bi–S  | 3.313               | 0.142 | 3.309                | 0.162 |
|                                                                                                  | Bi–S  | 3.232               | 0.159 | 3.227                | 0.182 |
|                                                                                                  | Bi–P  | 3.576               | 0.085 | 3.571                | 0.097 |
| <b>2b</b>                                                                                        | Bi–Cl | 2.686               | 0.715 | 2.723                | 0.712 |
|                                                                                                  | Bi–Cl | 2.710               | 0.680 | 2.747                | 0.674 |
|                                                                                                  | Bi–Cl | 2.716               | 0.677 | 2.755                | 0.672 |
|                                                                                                  | Bi–S  | 3.250               | 0.161 | 3.217                | 0.193 |
|                                                                                                  | Bi–S  | 3.332               | 0.138 | 3.325                | 0.160 |
|                                                                                                  | Bi–S  | 3.250               | 0.155 | 3.249                | 0.176 |
|                                                                                                  | Bi–P  | 3.631               | 0.077 | 3.606                | 0.093 |
| <b>2c</b>                                                                                        | Bi–Cl | 2.930               | 0.762 | 2.971                | 0.745 |
|                                                                                                  | Bi–Cl | 2.905               | 0.798 | 2.944                | 0.780 |
|                                                                                                  | Bi–Cl | 2.918               | 0.765 | 2.955                | 0.747 |
|                                                                                                  | Bi–S  | 3.278               | 0.154 | 3.224                | 0.191 |
|                                                                                                  | Bi–S  | 3.315               | 0.138 | 3.310                | 0.160 |
|                                                                                                  | Bi–S  | 3.375               | 0.127 | 3.381                | 0.147 |
|                                                                                                  | Bi–P  | 3.732               | 0.062 | 3.701                | 0.076 |

| <b>Table S7 Bond distances (<i>d</i>, Å) for complexes 2a-c at MP2/cc-pvdz(-PP) level</b> |       |          |
|-------------------------------------------------------------------------------------------|-------|----------|
|                                                                                           |       | <i>d</i> |
| <b>2a</b>                                                                                 | Bi–Cl | 2.561    |
|                                                                                           | Bi–Cl | 2.564    |
|                                                                                           | Bi–Cl | 2.541    |
|                                                                                           | Bi–S  | 3.189    |
|                                                                                           | Bi–S  | 3.197    |
|                                                                                           | Bi–S  | 3.232    |
|                                                                                           | Bi–P  | 3.437    |
| <b>2b</b>                                                                                 | Bi–Cl | 2.719    |
|                                                                                           | Bi–Cl | 2.724    |
|                                                                                           | Bi–Cl | 2.700    |
|                                                                                           | Bi–S  | 3.149    |
|                                                                                           | Bi–S  | 3.201    |
|                                                                                           | Bi–S  | 3.230    |
|                                                                                           | Bi–P  | 3.445    |
| <b>2c</b>                                                                                 | Bi–Cl | 2.924    |
|                                                                                           | Bi–Cl | 2.937    |
|                                                                                           | Bi–Cl | 2.945    |
|                                                                                           | Bi–S  | 3.145    |
|                                                                                           | Bi–S  | 3.255    |
|                                                                                           | Bi–S  | 3.231    |
|                                                                                           | Bi–P  | 3.499    |

**Table S8 Interaction energies ( $E^{(2)}$ , kcal/mol) from the second order perturbational theory on NBO basis for P→Bi and S→Bi donations at ωB97XD/cc-pvdz(-PP) level  
 These values were obtained as the sum of all donor-acceptor interactions above 0.05 kcal/mol from the lone pair at P or any lone pair at the S centres to any vacant orbital at the Bi centre.**

|           |       | $E^{(2)}$ |
|-----------|-------|-----------|
| <b>2a</b> | P-Bi  | 19.8      |
|           | S1-Bi | 43.8      |
|           | S2-Bi | 42.7      |
|           | S3-Bi | 48.9      |
| <b>2b</b> | P-Bi  | 16.2      |
|           | S1-Bi | 47.6      |
|           | S2-Bi | 36.0      |
|           | S3-Bi | 47.2      |
| <b>2c</b> | P-Bi  | 12.3      |
|           | S1-Bi | 36.1      |
|           | S2-Bi | 32.9      |
|           | S3-Bi | 29.6      |



**Table S9 NPA partial charges ( $q$ , e) at  $\omega$ B97XD/cc-pvdz(-PP) level**  
**The net charge donation ( $\Delta q$ , e) from the ligand towards the  $\text{BiX}_3$  moiety is defined as the sum of partial charges in the ligand fragment.**

|                                   |            | $q$    |
|-----------------------------------|------------|--------|
| <b>1</b>                          | P          | 0.833  |
|                                   | S          | 0.164  |
|                                   | S          | 0.177  |
|                                   | S          | 0.173  |
| <b><math>\text{BiCl}_3</math></b> | Bi         | 1.462  |
|                                   | Cl         | -0.487 |
| <b>2a</b>                         | Bi         | 1.360  |
|                                   | Cl         | -0.544 |
|                                   | Cl         | -0.571 |
|                                   | Cl         | -0.571 |
|                                   | $\Delta q$ | 0.326  |
|                                   | P          | 0.838  |
|                                   | S          | 0.209  |
|                                   | S          | 0.189  |
| <b><math>\text{BiBr}_3</math></b> | Bi         | 1.217  |
|                                   | Br         | -0.406 |
| <b>2b</b>                         | Bi         | 1.146  |
|                                   | Br         | -0.471 |
|                                   | Br         | -0.503 |
|                                   | Br         | -0.504 |
|                                   | $\Delta q$ | 0.332  |
|                                   | P          | 0.840  |
|                                   | S          | 0.216  |
|                                   | S          | 0.195  |
| <b><math>\text{BiI}_3</math></b>  | Bi         | 0.850  |
|                                   | I          | -0.284 |
| <b>2c</b>                         | Bi         | 0.847  |
|                                   | I          | -0.401 |
|                                   | I          | -0.351 |
|                                   | I          | -0.401 |
|                                   | $\Delta q$ | 0.306  |
|                                   | P          | 0.839  |
|                                   | S          | 0.219  |
|                                   | S          | 0.218  |
| S                                 | 0.195      |        |

**Total energies and Cartesian coordinates at the  $\omega$ B97XD/cc-pVDZ(-PP) level**

**1**

55

scf done: -2466.504433

|   |           |           |           |
|---|-----------|-----------|-----------|
| C | -2.218550 | 2.084779  | 0.856857  |
| C | -0.900920 | 1.792357  | 0.489272  |
| C | 0.028466  | 2.848069  | 0.369699  |
| C | -0.385001 | 4.155285  | 0.637674  |
| C | -1.699266 | 4.434418  | 1.005870  |
| C | -2.619536 | 3.396099  | 1.110611  |
| P | -0.315950 | 0.085658  | 0.074027  |
| C | -1.889249 | -0.894505 | 0.112883  |
| C | -2.521218 | -1.176688 | -1.116277 |
| C | -3.702313 | -1.923517 | -1.117373 |
| C | -4.255221 | -2.399918 | 0.069624  |
| C | -3.625020 | -2.132855 | 1.281382  |
| C | -2.449895 | -1.382713 | 1.297576  |
| C | -1.926398 | -0.734002 | -2.430758 |
| S | -0.602331 | -1.901092 | -2.947388 |
| C | 0.573958  | -0.732193 | -3.684674 |
| C | 1.446967  | 2.610176  | -0.084893 |
| S | 1.529890  | 2.761170  | -1.910637 |
| C | 3.145345  | 1.982239  | -2.182518 |
| C | 0.469954  | -0.445268 | 1.665381  |
| C | 1.237956  | -1.630129 | 1.658607  |
| C | 1.835938  | -2.054960 | 2.848663  |
| C | 1.712657  | -1.319620 | 4.026622  |
| C | 0.975315  | -0.140390 | 4.025711  |
| C | 0.355015  | 0.286673  | 2.851416  |
| C | 1.456849  | -2.436302 | 0.402309  |
| S | 2.760709  | -1.753356 | -0.689068 |
| C | 4.219138  | -2.000254 | 0.358455  |
| H | 3.134005  | 0.946948  | -1.808990 |
| H | 3.949845  | 2.552924  | -1.695223 |
| H | 3.321323  | 1.975824  | -3.267078 |
| H | 0.830125  | 0.051462  | -2.955349 |
| H | 0.168892  | -0.282756 | -4.602771 |
| H | 1.476100  | -1.308726 | -3.932008 |
| H | 5.081362  | -1.614561 | -0.202811 |
| H | 4.381490  | -3.068312 | 0.568433  |
| H | 4.131347  | -1.443725 | 1.302926  |
| H | 1.808053  | 1.606885  | 0.185100  |
| H | 2.124933  | 3.348469  | 0.368979  |
| H | -1.468955 | 0.262704  | -2.354781 |
| H | -2.702432 | -0.692517 | -3.208055 |
| H | 0.566523  | -2.476077 | -0.242270 |
| H | 1.727852  | -3.472981 | 0.652618  |
| H | -2.946130 | 1.276646  | 0.946097  |
| H | -3.653950 | 3.601239  | 1.392308  |
| H | -2.002049 | 5.463859  | 1.205423  |
| H | 0.338721  | 4.968527  | 0.544130  |
| H | -1.958407 | -1.174838 | 2.250037  |
| H | -4.045496 | -2.506661 | 2.216749  |

|   |           |           |           |
|---|-----------|-----------|-----------|
| H | -5.176979 | -2.984200 | 0.044654  |
| H | -4.191896 | -2.141101 | -2.069534 |
| H | -0.234388 | 1.205633  | 2.861008  |
| H | 0.870955  | 0.446551  | 4.940032  |
| H | 2.193292  | -1.671023 | 4.941408  |
| H | 2.412993  | -2.983303 | 2.849339  |

1'

56

scf done: -2163.872189

|   |           |           |           |
|---|-----------|-----------|-----------|
| C | -0.673374 | -1.574210 | 1.881037  |
| C | 0.562362  | -1.069477 | 1.430693  |
| C | 1.738639  | -1.612116 | 1.959261  |
| C | 1.708421  | -2.629653 | 2.909839  |
| C | 0.486840  | -3.126413 | 3.353379  |
| C | -0.690652 | -2.597416 | 2.834688  |
| C | 0.611890  | 0.086494  | 0.429743  |
| C | 1.960470  | 0.163605  | -0.286223 |
| C | 2.254799  | -0.710248 | -1.351625 |
| C | 3.513391  | -0.651368 | -1.957569 |
| C | 4.485233  | 0.246887  | -1.525517 |
| C | 4.195808  | 1.110162  | -0.473722 |
| C | 2.943343  | 1.063967  | 0.135003  |
| C | 1.230571  | -1.667541 | -1.905767 |
| S | 0.297121  | -0.796280 | -3.222541 |
| C | -1.083474 | -1.948714 | -3.449318 |
| C | -1.994651 | -1.077299 | 1.350158  |
| S | -2.618771 | -2.276887 | 0.113723  |
| C | -4.128265 | -1.413074 | -0.395236 |
| C | 0.236352  | 1.420957  | 1.073518  |
| C | 0.378898  | 1.620534  | 2.448711  |
| C | 0.094229  | 2.850662  | 3.040525  |
| C | -0.339675 | 3.910818  | 2.252930  |
| C | -0.489307 | 3.722862  | 0.880418  |
| C | -0.213329 | 2.493248  | 0.274579  |
| C | -0.426004 | 2.356199  | -1.210791 |
| S | -2.005522 | 1.542379  | -1.663371 |
| C | -3.186601 | 2.711157  | -0.934180 |
| H | -3.879049 | -0.435890 | -0.832037 |
| H | -4.813812 | -1.285562 | 0.455625  |
| H | -4.618041 | -2.036051 | -1.156074 |
| H | -1.611213 | -2.098235 | -2.496288 |
| H | -0.732420 | -2.911743 | -3.848302 |
| H | -1.765055 | -1.485701 | -4.175997 |
| H | -4.190953 | 2.315724  | -1.140900 |
| H | -3.096026 | 3.705691  | -1.396667 |
| H | -3.051186 | 2.794837  | 0.153995  |
| H | -1.922376 | -0.091961 | 0.870968  |
| H | -2.730217 | -1.009200 | 2.166340  |
| H | 0.520540  | -2.014479 | -1.141817 |
| H | 1.723594  | -2.551531 | -2.336014 |
| H | 0.341194  | 1.734893  | -1.692748 |
| H | -0.401562 | 3.344442  | -1.693093 |

|   |           |           |           |
|---|-----------|-----------|-----------|
| H | 2.701734  | -1.229034 | 1.620141  |
| H | 2.643909  | -3.031532 | 3.303336  |
| H | 0.448319  | -3.922594 | 4.098645  |
| H | -1.654704 | -2.988153 | 3.169426  |
| H | 2.723377  | 1.745696  | 0.957916  |
| H | 4.942933  | 1.824275  | -0.122815 |
| H | 5.461196  | 0.273622  | -2.013008 |
| H | 3.728863  | -1.325437 | -2.790028 |
| H | 0.726085  | 0.795545  | 3.072555  |
| H | 0.219681  | 2.976528  | 4.117338  |
| H | -0.559808 | 4.881557  | 2.700421  |
| H | -0.827045 | 4.553687  | 0.255625  |
| H | -0.148692 | -0.116935 | -0.338720 |

### BiCl<sub>3</sub>

4

scf done: -1595.433450

|    |           |           |           |
|----|-----------|-----------|-----------|
| Bi | 0.000000  | 0.000000  | 0.000000  |
| Cl | 0.000000  | 0.000000  | 2.458721  |
| Cl | 2.430697  | 0.000000  | -0.373556 |
| Cl | -0.433006 | -2.394553 | -0.363585 |

### BiBr<sub>3</sub>

4

scf done: -7937.400851

|    |           |           |           |
|----|-----------|-----------|-----------|
| Bi | -0.009077 | 0.011160  | -0.007129 |
| Br | 0.016363  | -0.020550 | 2.600024  |
| Br | 2.558038  | -0.020672 | -0.466670 |
| Br | -0.563139 | -2.495177 | -0.466893 |

### BiI<sub>3</sub>

4

scf done: -1102.196384

|    |           |           |           |
|----|-----------|-----------|-----------|
| Bi | -0.015081 | 0.018697  | -0.011393 |
| I  | 0.021279  | -0.024816 | 2.813398  |
| I  | 2.755726  | -0.027164 | -0.556105 |
| I  | -0.683156 | -2.673117 | -0.550797 |

### 2a

59

scf done: -4061.990272

|   |          |           |           |
|---|----------|-----------|-----------|
| C | 3.179501 | -0.696597 | -2.312863 |
| C | 2.405018 | -1.164609 | -1.236928 |
| C | 2.054649 | -2.542356 | -1.199670 |
| C | 2.497819 | -3.377515 | -2.237921 |
| C | 3.255261 | -2.894464 | -3.306425 |
| C | 3.599603 | -1.544771 | -3.340832 |
| P | 1.698735 | 0.057641  | -0.013176 |
| C | 2.471469 | -0.421399 | 1.617835  |
| C | 1.882747 | 0.027868  | 2.824768  |
| C | 2.446593 | -0.377245 | 4.046093  |
| C | 3.570307 | -1.200841 | 4.094755  |
| C | 4.157548 | -1.636438 | 2.904268  |

|    |           |           |           |
|----|-----------|-----------|-----------|
| C  | 3.609711  | -1.246184 | 1.681077  |
| C  | 0.671917  | 0.932970  | 2.869551  |
| S  | -0.896762 | -0.053858 | 3.036464  |
| C  | -2.010424 | 1.218153  | 3.741009  |
| C  | 1.271694  | -3.186605 | -0.080875 |
| S  | -0.567157 | -2.968825 | -0.062639 |
| C  | -1.051346 | -3.651697 | -1.685645 |
| C  | 2.625799  | 1.635191  | -0.413466 |
| C  | 3.867573  | 1.926983  | 0.178238  |
| C  | 4.538967  | 3.120572  | -0.092061 |
| C  | 3.972373  | 4.049963  | -0.966595 |
| C  | 2.739652  | 3.775051  | -1.557438 |
| C  | 2.049220  | 2.579766  | -1.297367 |
| C  | 0.709746  | 2.372015  | -1.962190 |
| S  | -0.671585 | 2.856826  | -0.817537 |
| C  | -1.912045 | 3.448818  | -2.026251 |
| Bi | -2.086850 | -0.055799 | -0.070986 |
| Cl | -2.259178 | -0.134113 | -2.647707 |
| Cl | -3.795948 | 1.773705  | 0.568892  |
| Cl | -3.806591 | -1.898173 | 0.375165  |
| H  | -2.144117 | 2.655310  | -2.750045 |
| H  | -1.539045 | 4.354469  | -2.526875 |
| H  | -2.812672 | 3.680599  | -1.442464 |
| H  | -2.129795 | 2.070026  | 3.057736  |
| H  | -1.630350 | 1.543572  | 4.720817  |
| H  | -2.987748 | 0.731815  | 3.866278  |
| H  | -2.146550 | -3.571672 | -1.718098 |
| H  | -0.754294 | -4.709124 | -1.753186 |
| H  | -0.618545 | -3.067509 | -2.509172 |
| H  | 0.542644  | 1.336599  | -2.291740 |
| H  | 0.626093  | 3.022299  | -2.844149 |
| H  | 0.594363  | 1.582851  | 1.987411  |
| H  | 0.722802  | 1.575758  | 3.760961  |
| H  | 1.575349  | -2.813529 | 0.906666  |
| H  | 1.453320  | -4.271996 | -0.084214 |
| H  | 4.320038  | 1.210020  | 0.863762  |
| H  | 5.503233  | 3.320506  | 0.380528  |
| H  | 4.486523  | 4.987936  | -1.187669 |
| H  | 2.291705  | 4.504315  | -2.237119 |
| H  | 4.071002  | -1.590077 | 0.753216  |
| H  | 5.042003  | -2.277172 | 2.924890  |
| H  | 3.986928  | -1.499304 | 5.059131  |
| H  | 1.986034  | -0.036603 | 4.976892  |
| H  | 3.466105  | 0.354440  | -2.350451 |
| H  | 4.199999  | -1.144646 | -4.160809 |
| H  | 3.577045  | -3.572591 | -4.099644 |
| H  | 2.242591  | -4.439714 | -2.198162 |

## 2b

59

scf done: -10403.9561551

|   |          |           |           |
|---|----------|-----------|-----------|
| C | 3.366670 | -0.236660 | -2.400621 |
| C | 2.673100 | -0.907950 | -1.385550 |

|    |           |           |           |
|----|-----------|-----------|-----------|
| C  | 2.348562  | -2.272727 | -1.570721 |
| C  | 2.725600  | -2.897305 | -2.764063 |
| C  | 3.397301  | -2.212784 | -3.773300 |
| C  | 3.722583  | -0.875160 | -3.586467 |
| P  | 2.042599  | 0.051021  | 0.068220  |
| C  | 2.830752  | -0.761510 | 1.530918  |
| C  | 2.272101  | -0.564590 | 2.807949  |
| C  | 2.852685  | -1.208795 | 3.907332  |
| C  | 3.970614  | -2.021847 | 3.763509  |
| C  | 4.535167  | -2.201553 | 2.501733  |
| C  | 3.967085  | -1.573011 | 1.398862  |
| C  | 1.065878  | 0.311550  | 3.052821  |
| S  | -0.475543 | -0.689400 | 3.003676  |
| C  | -1.596882 | 0.405387  | 3.922412  |
| C  | 1.642457  | -3.116752 | -0.539691 |
| S  | -0.164177 | -2.890459 | -0.382197 |
| C  | -0.706648 | -3.312097 | -2.058912 |
| C  | 3.022301  | 1.625395  | -0.025285 |
| C  | 4.251604  | 1.767302  | 0.632058  |
| C  | 4.967756  | 2.959161  | 0.572103  |
| C  | 4.460352  | 4.034190  | -0.152516 |
| C  | 3.240632  | 3.905459  | -0.807779 |
| C  | 2.508955  | 2.714129  | -0.758193 |
| C  | 1.182069  | 2.655655  | -1.469831 |
| S  | -0.174214 | 3.003014  | -0.283066 |
| C  | -1.376125 | 3.785378  | -1.396163 |
| Bi | -1.587650 | 0.001961  | 0.028649  |
| Br | -1.696026 | 0.258543  | -2.666558 |
| Br | -3.376704 | 1.823828  | 0.954430  |
| Br | -3.444214 | -1.923203 | 0.275108  |
| H  | -1.625331 | 3.108320  | -2.224660 |
| H  | -0.970407 | 4.736258  | -1.769261 |
| H  | -2.277412 | 3.968478  | -0.797811 |
| H  | -1.643404 | 1.401646  | 3.462344  |
| H  | -1.281427 | 0.470184  | 4.973091  |
| H  | -2.593713 | -0.051119 | 3.860262  |
| H  | -1.798782 | -3.197261 | -2.059596 |
| H  | -0.443416 | -4.355388 | -2.284859 |
| H  | -0.270835 | -2.625784 | -2.797629 |
| H  | 0.994761  | 1.687936  | -1.959685 |
| H  | 1.140910  | 3.431728  | -2.246260 |
| H  | 0.991346  | 1.138144  | 2.331581  |
| H  | 1.129043  | 0.751115  | 4.058745  |
| H  | 2.023466  | -2.941339 | 0.474570  |
| H  | 1.809768  | -4.181271 | -0.760632 |
| H  | 4.659963  | 0.934383  | 1.204575  |
| H  | 5.923382  | 3.044456  | 1.091896  |
| H  | 5.011077  | 4.974771  | -0.206242 |
| H  | 2.836333  | 4.750527  | -1.369322 |
| H  | 4.407901  | -1.717748 | 0.409900  |
| H  | 5.417976  | -2.830287 | 2.375265  |
| H  | 4.403517  | -2.512110 | 4.636864  |
| H  | 2.409472  | -1.067952 | 4.895816  |

|   |          |           |           |
|---|----------|-----------|-----------|
| H | 3.639634 | 0.810347  | -2.266228 |
| H | 4.258458 | -0.320936 | -4.358680 |
| H | 3.667992 | -2.727704 | -4.696322 |
| H | 2.484276 | -3.954005 | -2.901444 |

## 2c

59

scf done: -3568.747709

|    |           |           |           |
|----|-----------|-----------|-----------|
| C  | 2.936642  | 2.706962  | -0.667960 |
| C  | 3.436630  | 1.614355  | 0.068028  |
| C  | 4.657788  | 1.751187  | 0.741087  |
| C  | 5.378415  | 2.941081  | 0.692663  |
| C  | 4.884547  | 4.019138  | -0.036639 |
| C  | 3.672814  | 3.895680  | -0.707658 |
| P  | 2.444141  | 0.045683  | 0.144938  |
| C  | 3.226999  | -0.782571 | 1.602305  |
| C  | 2.655231  | -0.608145 | 2.876288  |
| C  | 3.234285  | -1.258127 | 3.973217  |
| C  | 4.363061  | -2.055804 | 3.829206  |
| C  | 4.939093  | -2.215538 | 2.569734  |
| C  | 4.372762  | -1.580857 | 1.469685  |
| C  | 1.434188  | 0.247687  | 3.118040  |
| S  | -0.093888 | -0.771765 | 3.027044  |
| C  | -1.213694 | 0.240115  | 4.037591  |
| C  | 1.617799  | 2.652090  | -1.393944 |
| S  | 0.243530  | 3.000484  | -0.226577 |
| C  | -0.866668 | 3.932270  | -1.318869 |
| C  | 3.080788  | -0.906832 | -1.311447 |
| C  | 3.779925  | -0.233256 | -2.321078 |
| C  | 4.144030  | -0.869496 | -3.505752 |
| C  | 3.823084  | -2.207667 | -3.696092 |
| C  | 3.146204  | -2.894642 | -2.691915 |
| C  | 2.759067  | -2.271567 | -1.501011 |
| C  | 2.043275  | -3.115374 | -0.476704 |
| S  | 0.231070  | -2.907966 | -0.361706 |
| C  | -0.266910 | -3.389718 | -2.035378 |
| Bi | -1.286696 | 0.007193  | 0.074813  |
| I  | -3.267262 | -2.091032 | 0.408819  |
| I  | -1.448031 | 0.284839  | -2.825959 |
| I  | -3.192833 | 1.989997  | 1.085794  |
| H  | -1.147101 | 3.326131  | -2.191561 |
| H  | -0.380407 | 4.867916  | -1.628749 |
| H  | -1.765918 | 4.156851  | -0.731701 |
| H  | -1.278271 | 1.266091  | 3.650379  |
| H  | -0.881813 | 0.235632  | 5.085339  |
| H  | -2.205788 | -0.224975 | 3.960861  |
| H  | -1.359992 | -3.289541 | -2.069880 |
| H  | 0.012121  | -4.436814 | -2.222016 |
| H  | 0.180128  | -2.724871 | -2.786969 |
| H  | 1.437219  | 1.685642  | -1.887830 |
| H  | 1.586220  | 3.428159  | -2.170473 |
| H  | 1.360881  | 1.085587  | 2.409886  |
| H  | 1.475437  | 0.669374  | 4.132579  |

|   |          |           |           |
|---|----------|-----------|-----------|
| H | 2.399189 | -2.925891 | 0.543822  |
| H | 2.227350 | -4.180013 | -0.683716 |
| H | 5.056647 | 0.916580  | 1.317644  |
| H | 6.327506 | 3.022130  | 1.224978  |
| H | 5.439363 | 4.957777  | -0.081733 |
| H | 3.278861 | 4.742774  | -1.273609 |
| H | 4.822194 | -1.710089 | 0.482470  |
| H | 5.829902 | -2.832898 | 2.443261  |
| H | 4.795230 | -2.550452 | 4.700473  |
| H | 2.781518 | -1.134012 | 4.959621  |
| H | 4.051958 | 0.813551  | -2.182999 |
| H | 4.683948 | -0.313301 | -4.273734 |
| H | 4.101530 | -2.721182 | -4.617594 |
| H | 2.908880 | -3.952009 | -2.831490 |

## 2'a

60

scf done: -3759.342830

|    |           |           |           |
|----|-----------|-----------|-----------|
| C  | -2.040346 | -0.576292 | 2.494794  |
| C  | -2.726088 | 0.205039  | 1.547752  |
| C  | -3.739365 | 1.062898  | 1.992997  |
| C  | -4.070272 | 1.159638  | 3.340875  |
| C  | -3.384170 | 0.391638  | 4.278327  |
| C  | -2.377360 | -0.463990 | 3.848775  |
| C  | -2.417615 | 0.084470  | 0.054904  |
| C  | -2.824750 | 1.345708  | -0.710543 |
| C  | -2.082949 | 2.535968  | -0.588641 |
| C  | -2.492772 | 3.672217  | -1.296004 |
| C  | -3.625549 | 3.659207  | -2.100944 |
| C  | -4.371819 | 2.488545  | -2.206073 |
| C  | -3.970013 | 1.348909  | -1.516133 |
| C  | -0.856021 | 2.659911  | 0.285145  |
| S  | 0.670598  | 2.645088  | -0.741900 |
| C  | 1.781725  | 3.651124  | 0.288645  |
| C  | -0.921715 | -1.520837 | 2.125334  |
| S  | 0.693538  | -0.723912 | 2.496510  |
| C  | 1.705420  | -2.163815 | 2.947261  |
| C  | -3.022931 | -1.185102 | -0.550363 |
| C  | -4.052980 | -1.867550 | 0.102989  |
| C  | -4.639022 | -3.006807 | -0.446997 |
| C  | -4.200842 | -3.484308 | -1.676343 |
| C  | -3.180397 | -2.809919 | -2.341885 |
| C  | -2.582210 | -1.667821 | -1.800764 |
| C  | -1.486287 | -1.005651 | -2.592730 |
| S  | 0.210710  | -1.458270 | -2.070661 |
| C  | 0.162967  | -3.265784 | -2.010737 |
| Bi | 2.411212  | -0.024065 | -0.169291 |
| Cl | 3.816047  | 0.995525  | -1.993636 |
| Cl | 3.355967  | -2.392268 | -0.220701 |
| Cl | 3.792722  | 0.882594  | 1.742946  |
| H  | 1.750982  | -2.892768 | 2.127641  |
| H  | 1.308776  | -2.620383 | 3.864569  |
| H  | 2.716754  | -1.776759 | 3.131537  |



|   |           |           |           |
|---|-----------|-----------|-----------|
| H | 1.905167  | 3.216382  | 1.290028  |
| H | 1.397546  | 4.678430  | 0.353756  |
| H | 2.755348  | 3.651208  | -0.220259 |
| H | 1.155635  | -3.568793 | -1.650652 |
| H | -0.007541 | -3.680534 | -3.013927 |
| H | -0.609900 | -3.618685 | -1.314669 |
| H | -0.949054 | -1.837200 | 1.074163  |
| H | -0.977820 | -2.425959 | 2.747276  |
| H | -0.796655 | 1.882952  | 1.057464  |
| H | -0.872244 | 3.630970  | 0.801233  |
| H | -1.511341 | 0.090106  | -2.513929 |
| H | -1.583346 | -1.257939 | -3.657981 |
| H | -4.281355 | 1.669631  | 1.266585  |
| H | -4.863859 | 1.838828  | 3.656650  |
| H | -3.628064 | 0.461155  | 5.339508  |
| H | -1.825475 | -1.060250 | 4.579264  |
| H | -4.557784 | 0.434710  | -1.607774 |
| H | -5.269070 | 2.458419  | -2.826637 |
| H | -3.924404 | 4.559623  | -2.639747 |
| H | -1.901961 | 4.587300  | -1.210084 |
| H | -4.412055 | -1.498946 | 1.064395  |
| H | -5.442437 | -3.514474 | 0.089485  |
| H | -4.650770 | -4.373235 | -2.121094 |
| H | -2.836708 | -3.175614 | -3.312707 |
| H | -1.324851 | -0.011122 | -0.050304 |

## 2'b

60

scf done: -10101.3097278

|   |           |           |           |
|---|-----------|-----------|-----------|
| C | -2.587329 | -0.619928 | 2.463376  |
| C | -3.269241 | 0.177711  | 1.527466  |
| C | -4.292616 | 1.019043  | 1.980848  |
| C | -4.638516 | 1.082396  | 3.326967  |
| C | -3.957250 | 0.297171  | 4.253751  |
| C | -2.939644 | -0.541360 | 3.815838  |
| C | -2.944274 | 0.090622  | 0.036151  |
| C | -3.348079 | 1.365248  | -0.708235 |
| C | -2.614630 | 2.556099  | -0.548952 |
| C | -3.021987 | 3.706417  | -1.234280 |
| C | -4.143639 | 3.705632  | -2.054959 |
| C | -4.880068 | 2.533049  | -2.199630 |
| C | -4.480918 | 1.379811  | -1.530844 |
| C | -1.395884 | 2.661812  | 0.338010  |
| S | 0.140993  | 2.641807  | -0.674626 |
| C | 1.221194  | 3.704521  | 0.330983  |
| C | -1.458466 | -1.547516 | 2.082243  |
| S | 0.150702  | -0.757705 | 2.495738  |
| C | 1.137088  | -2.205572 | 2.976197  |
| C | -3.539721 | -1.167128 | -0.601260 |
| C | -4.591247 | -1.850855 | 0.014789  |
| C | -5.172680 | -2.975594 | -0.568961 |
| C | -4.706895 | -3.436773 | -1.794445 |
| C | -3.662683 | -2.761805 | -2.421904 |

|    |           |           |           |
|----|-----------|-----------|-----------|
| C  | -3.069203 | -1.634211 | -1.846404 |
| C  | -1.941275 | -0.970391 | -2.590582 |
| S  | -0.271860 | -1.446775 | -2.005472 |
| C  | -0.329055 | -3.254793 | -2.035339 |
| Bi | 1.962278  | 0.004742  | -0.115845 |
| Br | 3.386231  | 1.173338  | -2.046710 |
| Br | 3.035451  | -2.466063 | -0.221569 |
| Br | 3.368687  | 0.971293  | 1.941311  |
| H  | 1.188122  | -2.941346 | 2.162812  |
| H  | 0.716865  | -2.652477 | 3.887881  |
| H  | 2.149759  | -1.831631 | 3.179408  |
| H  | 1.342552  | 3.304838  | 1.346973  |
| H  | 0.814639  | 4.724936  | 0.357945  |
| H  | 2.199336  | 3.708805  | -0.169298 |
| H  | 0.650742  | -3.584242 | -1.663074 |
| H  | -0.472272 | -3.618102 | -3.062544 |
| H  | -1.124254 | -3.636234 | -1.380675 |
| H  | -1.468659 | -1.832378 | 1.021893  |
| H  | -1.518237 | -2.470589 | 2.676677  |
| H  | -1.350636 | 1.877377  | 1.103547  |
| H  | -1.408067 | 3.628283  | 0.862338  |
| H  | -1.961116 | 0.124603  | -2.498842 |
| H  | -1.998804 | -1.208867 | -3.661969 |
| H  | -4.830506 | 1.638512  | 1.262068  |
| H  | -5.440057 | 1.748825  | 3.649838  |
| H  | -4.213420 | 0.340056  | 5.313506  |
| H  | -2.391297 | -1.150344 | 4.538484  |
| H  | -5.060845 | 0.464238  | -1.652814 |
| H  | -5.767274 | 2.511927  | -2.834853 |
| H  | -4.440809 | 4.616834  | -2.576264 |
| H  | -2.438509 | 4.622913  | -1.118641 |
| H  | -4.971129 | -1.494581 | 0.972883  |
| H  | -5.994058 | -3.484776 | -0.061891 |
| H  | -5.153022 | -4.314209 | -2.265141 |
| H  | -3.295952 | -3.115622 | -3.388732 |
| H  | -1.850285 | 0.000950  | -0.057756 |

2'c

60

scf done: -3266.103055

|   |           |           |           |
|---|-----------|-----------|-----------|
| C | -3.079717 | -1.238474 | 2.181230  |
| C | -3.807052 | -0.262335 | 1.475803  |
| C | -4.903168 | 0.341444  | 2.102954  |
| C | -5.291951 | -0.015900 | 3.390555  |
| C | -4.581199 | -0.994516 | 4.080669  |
| C | -3.481606 | -1.590515 | 3.474576  |
| C | -3.459486 | 0.081875  | 0.026726  |
| C | -3.872943 | 1.510250  | -0.331155 |
| C | -3.098863 | 2.608793  | 0.088204  |
| C | -3.533826 | 3.905080  | -0.207201 |
| C | -4.715638 | 4.133810  | -0.902776 |
| C | -5.479752 | 3.048431  | -1.322449 |
| C | -5.056301 | 1.753252  | -1.037204 |

|    |           |           |           |
|----|-----------|-----------|-----------|
| C  | -1.784726 | 2.446519  | 0.811024  |
| S  | -0.380918 | 2.460427  | -0.390254 |
| C  | 0.667307  | 3.781693  | 0.284776  |
| C  | -1.831381 | -1.876361 | 1.625377  |
| S  | -0.348059 | -0.955137 | 2.225583  |
| C  | 0.591486  | -2.267928 | 3.055088  |
| C  | -4.028235 | -0.948101 | -0.951957 |
| C  | -5.117227 | -1.749758 | -0.600624 |
| C  | -5.675382 | -2.657211 | -1.500515 |
| C  | -5.146053 | -2.776704 | -2.779986 |
| C  | -4.057218 | -1.986781 | -3.141712 |
| C  | -3.486811 | -1.075735 | -2.248147 |
| C  | -2.284846 | -0.291689 | -2.702237 |
| S  | -0.700777 | -0.990633 | -2.097023 |
| C  | -0.765331 | -2.705283 | -2.669993 |
| Bi | 1.675218  | 0.005681  | -0.080668 |
| I  | 3.223190  | 1.409012  | -2.089020 |
| I  | 2.793836  | -2.681721 | -0.286033 |
| I  | 3.024659  | 1.023641  | 2.263130  |
| H  | 0.851007  | -3.067047 | 2.347914  |
| H  | 0.016007  | -2.657377 | 3.905894  |
| H  | 1.514929  | -1.798257 | 3.420217  |
| H  | 0.965192  | 3.554290  | 1.317371  |
| H  | 0.140977  | 4.744068  | 0.226058  |
| H  | 1.564004  | 3.811768  | -0.349697 |
| H  | 0.161046  | -3.171821 | -2.307054 |
| H  | -0.788438 | -2.745448 | -3.767929 |
| H  | -1.634426 | -3.228294 | -2.248500 |
| H  | -1.803204 | -1.904408 | 0.528292  |
| H  | -1.728840 | -2.908313 | 1.986895  |
| H  | -1.734260 | 1.532624  | 1.416484  |
| H  | -1.616704 | 3.290976  | 1.492481  |
| H  | -2.286027 | 0.745664  | -2.337370 |
| H  | -2.237635 | -0.252213 | -3.799471 |
| H  | -5.467808 | 1.106288  | 1.567945  |
| H  | -6.152884 | 0.470608  | 3.851969  |
| H  | -4.875954 | -1.287127 | 5.089714  |
| H  | -2.908842 | -2.345237 | 4.019171  |
| H  | -5.661178 | 0.907943  | -1.368815 |
| H  | -6.409839 | 3.206308  | -1.870841 |
| H  | -5.035383 | 5.154651  | -1.117440 |
| H  | -2.924762 | 4.753319  | 0.115006  |
| H  | -5.544959 | -1.662504 | 0.398690  |
| H  | -6.526699 | -3.267802 | -1.194783 |
| H  | -5.572801 | -3.481224 | -3.495737 |
| H  | -3.633129 | -2.078464 | -4.144687 |
| H  | -2.366139 | 0.028437  | -0.073437 |

# Total energies and Cartesian coordinates at the B3LYPD3/cc-pVDZ(-PP) level

1

55

scf done: -2466.919594

|   |           |           |           |
|---|-----------|-----------|-----------|
| C | -0.526149 | 2.864213  | 0.165912  |
| C | -1.248994 | 1.659836  | 0.355765  |
| C | -2.611372 | 1.729469  | 0.687163  |
| C | -3.257372 | 2.961482  | 0.831179  |
| C | -2.542786 | 4.146945  | 0.651085  |
| C | -1.186188 | 4.090430  | 0.321627  |
| P | -0.350482 | 0.056155  | 0.061848  |
| C | -1.718278 | -1.207462 | 0.164578  |
| C | -2.246311 | -1.718180 | -1.046256 |
| C | -3.259538 | -2.685655 | -0.991631 |
| C | -3.747396 | -3.156573 | 0.230178  |
| C | -3.221438 | -2.658958 | 1.423852  |
| C | -2.214521 | -1.689517 | 1.385580  |
| C | -1.710246 | -1.288552 | -2.391695 |
| S | -0.156255 | -2.229134 | -2.795230 |
| C | 0.842760  | -0.888311 | -3.539956 |
| C | 0.926750  | 2.863066  | -0.242605 |
| S | 1.053738  | 2.855918  | -2.091564 |
| C | 2.807296  | 2.355361  | -2.241076 |
| C | 0.513362  | -0.212763 | 1.690782  |
| C | 0.275027  | 0.592083  | 2.815236  |
| C | 0.969359  | 0.388570  | 4.012652  |
| C | 1.908448  | -0.639273 | 4.101284  |
| C | 2.152909  | -1.447918 | 2.987203  |
| C | 1.479770  | -1.246980 | 1.773082  |
| C | 1.829135  | -2.119137 | 0.592004  |
| S | 3.023768  | -1.330131 | -0.584607 |
| C | 4.505586  | -1.248994 | 0.481570  |
| H | 2.959190  | 1.369887  | -1.773278 |
| H | 3.473571  | 3.102722  | -1.781464 |
| H | 3.032612  | 2.288984  | -3.315827 |
| H | 0.910201  | -0.042141 | -2.839567 |
| H | 0.418854  | -0.559845 | -4.501412 |
| H | 1.846924  | -1.305259 | -3.705155 |
| H | 5.301114  | -0.779126 | -0.115549 |
| H | 4.832908  | -2.256746 | 0.785005  |
| H | 4.316382  | -0.635549 | 1.375869  |
| H | 1.461648  | 1.976765  | 0.128506  |
| H | 1.440095  | 3.757010  | 0.145055  |
| H | -1.450303 | -0.220554 | -2.408259 |
| H | -2.454903 | -1.471207 | -3.180732 |
| H | 0.963419  | -2.358351 | -0.042097 |
| H | 2.270177  | -3.070137 | 0.928930  |
| H | -3.178321 | 0.809541  | 0.835957  |
| H | -4.318797 | 2.989974  | 1.088791  |
| H | -3.037633 | 5.114210  | 0.764171  |
| H | -0.623463 | 5.015724  | 0.172128  |
| H | -1.806769 | -1.302348 | 2.321365  |
| H | -3.591970 | -3.021842 | 2.385445  |

|   |           |           |           |
|---|-----------|-----------|-----------|
| H | -4.534442 | -3.914072 | 0.246997  |
| H | -3.665717 | -3.081200 | -1.926363 |
| H | -0.468808 | 1.388799  | 2.756586  |
| H | 0.766053  | 1.028847  | 4.874296  |
| H | 2.450982  | -0.815240 | 5.032989  |
| H | 2.885328  | -2.256704 | 3.057243  |

1'

56

scf done: -2164.278054

|   |           |           |           |
|---|-----------|-----------|-----------|
| C | 0.470923  | 1.878832  | 2.297997  |
| C | 0.285597  | 1.547478  | 0.947661  |
| C | -0.185258 | 2.552458  | 0.064070  |
| C | -0.428681 | 3.840844  | 0.567539  |
| C | -0.236728 | 4.154890  | 1.914728  |
| C | 0.212367  | 3.163581  | 2.785667  |
| C | 0.637766  | 0.141124  | 0.431652  |
| C | 1.989598  | 0.117795  | -0.305179 |
| C | 2.261992  | -0.861347 | -1.291833 |
| C | 3.517071  | -0.871579 | -1.920468 |
| C | 4.508076  | 0.053791  | -1.591754 |
| C | 4.243825  | 1.016838  | -0.617619 |
| C | 2.996904  | 1.042302  | 0.012715  |
| C | 1.237847  | -1.878329 | -1.733916 |
| S | 0.281095  | -1.183916 | -3.160850 |
| C | -0.997896 | -2.477998 | -3.343448 |
| C | -0.445034 | 2.301865  | -1.401565 |
| S | -2.107714 | 1.572101  | -1.783591 |
| C | -3.207876 | 2.939973  | -1.274075 |
| C | 0.562352  | -0.926157 | 1.539572  |
| C | 1.734163  | -1.405446 | 2.148982  |
| C | 1.696918  | -2.348102 | 3.178546  |
| C | 0.468623  | -2.835957 | 3.626639  |
| C | -0.704300 | -2.370050 | 3.034278  |
| C | -0.682400 | -1.421148 | 1.998316  |
| C | -2.007967 | -0.985908 | 1.417856  |
| S | -2.714544 | -2.350113 | 0.379165  |
| C | -4.253190 | -1.530975 | -0.170564 |
| H | -4.020158 | -0.619818 | -0.741207 |
| H | -4.896543 | -1.286149 | 0.689266  |
| H | -4.780880 | -2.244448 | -0.820040 |
| H | -1.573736 | -2.585590 | -2.411902 |
| H | -0.544890 | -3.440953 | -3.626827 |
| H | -1.665759 | -2.144645 | -4.151061 |
| H | -4.235448 | 2.598477  | -1.468021 |
| H | -3.016843 | 3.845589  | -1.871621 |
| H | -3.101960 | 3.169740  | -0.203488 |
| H | -1.931899 | -0.087264 | 0.793275  |
| H | -2.726833 | -0.781153 | 2.227822  |
| H | 0.529132  | -2.140716 | -0.937046 |
| H | 1.735865  | -2.802384 | -2.065674 |
| H | 0.255071  | 1.581723  | -1.844500 |
| H | -0.359939 | 3.240244  | -1.970560 |

|   |           |           |           |
|---|-----------|-----------|-----------|
| H | 2.700359  | -1.033586 | 1.806488  |
| H | 2.629589  | -2.697791 | 3.627305  |
| H | 0.421935  | -3.573743 | 4.430800  |
| H | -1.670984 | -2.751731 | 3.372668  |
| H | 2.801112  | 1.801869  | 0.770669  |
| H | 5.004425  | 1.751956  | -0.344460 |
| H | 5.476951  | 0.022348  | -2.095174 |
| H | 3.712027  | -1.624670 | -2.688379 |
| H | 0.830928  | 1.113270  | 2.986547  |
| H | 0.370050  | 3.384159  | 3.843926  |
| H | -0.434610 | 5.166707  | 2.275798  |
| H | -0.769903 | 4.617803  | -0.121794 |
| H | -0.126596 | -0.121041 | -0.313176 |

### BiCl<sub>3</sub>

4

scf done: -1595.484978

|    |           |           |           |
|----|-----------|-----------|-----------|
| Bi | 0.000000  | 0.000000  | 0.000000  |
| Cl | 0.000000  | 0.000000  | 2.486855  |
| Cl | 2.452040  | 0.000000  | -0.410771 |
| Cl | -0.484006 | -2.405170 | -0.406507 |

### BiBr<sub>3</sub>

4

scf done: -7937.313268

|    |           |           |           |
|----|-----------|-----------|-----------|
| Bi | 0.000000  | 0.000000  | 0.000000  |
| Br | 0.000000  | 0.000000  | 2.639549  |
| Br | 2.593591  | 0.000000  | -0.490017 |
| Br | -0.591406 | -2.525240 | -0.490201 |

### BiI<sub>3</sub>

4

scf done: -1102.242473

|    |           |           |           |
|----|-----------|-----------|-----------|
| Bi | -0.011521 | 0.013363  | -0.008174 |
| I  | 0.009220  | -0.009166 | 2.847842  |
| I  | 2.787943  | -0.011044 | -0.575077 |
| I  | -0.706874 | -2.699554 | -0.569488 |

### 2a

59

scf done: -4062.458114

|   |          |           |           |
|---|----------|-----------|-----------|
| C | 2.933476 | -0.860329 | -2.319027 |
| C | 2.244688 | -1.265570 | -1.162141 |
| C | 1.924416 | -2.640843 | -1.005823 |
| C | 2.298837 | -3.537910 | -2.018339 |
| C | 2.966461 | -3.118291 | -3.169918 |
| C | 3.288931 | -1.770280 | -3.317013 |
| P | 1.593554 | 0.037900  | -0.004266 |
| C | 2.355444 | -0.358753 | 1.644870  |
| C | 1.807778 | 0.220036  | 2.812420  |
| C | 2.362469 | -0.111805 | 4.058970  |
| C | 3.446569 | -0.982418 | 4.164435  |

|    |           |           |           |
|----|-----------|-----------|-----------|
| C  | 4.002964  | -1.536321 | 3.007961  |
| C  | 3.460132  | -1.221596 | 1.761487  |
| C  | 0.645541  | 1.184822  | 2.781426  |
| S  | -0.960688 | 0.285018  | 3.031163  |
| C  | -2.037869 | 1.705947  | 3.452499  |
| C  | 1.216394  | -3.213255 | 0.197231  |
| S  | -0.611525 | -2.954540 | 0.290931  |
| C  | -1.138556 | -3.676401 | -1.303500 |
| C  | 2.579986  | 1.550920  | -0.484106 |
| C  | 3.822719  | 1.832437  | 0.109727  |
| C  | 4.546348  | 2.975424  | -0.234062 |
| C  | 4.033036  | 3.860856  | -1.184353 |
| C  | 2.801006  | 3.592400  | -1.779978 |
| C  | 2.061160  | 2.446275  | -1.448894 |
| C  | 0.726321  | 2.234469  | -2.116239 |
| S  | -0.635136 | 2.821877  | -1.001952 |
| C  | -1.900659 | 3.241917  | -2.257332 |
| Bi | -1.975986 | -0.050809 | -0.052504 |
| Cl | -1.840169 | -0.374208 | -2.623567 |
| Cl | -3.726840 | 1.824682  | 0.358445  |
| Cl | -3.801853 | -1.806471 | 0.366493  |
| H  | -2.103473 | 2.365949  | -2.889346 |
| H  | -1.552702 | 4.095947  | -2.857368 |
| H  | -2.807925 | 3.504961  | -1.698884 |
| H  | -2.039117 | 2.450333  | 2.644417  |
| H  | -1.708754 | 2.149213  | 4.404294  |
| H  | -3.056455 | 1.307023  | 3.553064  |
| H  | -2.232750 | -3.584430 | -1.319968 |
| H  | -0.844611 | -4.736082 | -1.345067 |
| H  | -0.710562 | -3.111485 | -2.142913 |
| H  | 0.529346  | 1.185512  | -2.384233 |
| H  | 0.663839  | 2.831970  | -3.036877 |
| H  | 0.591969  | 1.759601  | 1.845570  |
| H  | 0.730031  | 1.901407  | 3.612392  |
| H  | 1.586591  | -2.798047 | 1.143183  |
| H  | 1.376937  | -4.301276 | 0.237641  |
| H  | 4.235675  | 1.150461  | 0.853076  |
| H  | 5.510412  | 3.170376  | 0.240867  |
| H  | 4.588756  | 4.759545  | -1.460893 |
| H  | 2.393632  | 4.286841  | -2.518947 |
| H  | 3.895499  | -1.655184 | 0.858761  |
| H  | 4.859434  | -2.210922 | 3.073933  |
| H  | 3.859005  | -1.223697 | 5.146356  |
| H  | 1.928088  | 0.324687  | 4.961870  |
| H  | 3.201108  | 0.188545  | -2.447384 |
| H  | 3.820004  | -1.419158 | -4.204344 |
| H  | 3.234928  | -3.843027 | -3.941326 |
| H  | 2.057349  | -4.596539 | -1.893486 |

## 2b

59

scf done: -10404.2851867

|   |          |           |           |
|---|----------|-----------|-----------|
| C | 3.628254 | -0.731337 | -2.284227 |
|---|----------|-----------|-----------|

|    |           |           |           |
|----|-----------|-----------|-----------|
| C  | 2.857043  | -1.180951 | -1.198238 |
| C  | 2.487084  | -2.553001 | -1.148432 |
| C  | 2.908156  | -3.401690 | -2.184815 |
| C  | 3.661841  | -2.936627 | -3.264003 |
| C  | 4.025627  | -1.592370 | -3.310712 |
| P  | 2.179298  | 0.055146  | 0.028131  |
| C  | 2.973087  | -0.425657 | 1.648530  |
| C  | 2.399495  | 0.024411  | 2.862210  |
| C  | 2.977126  | -0.381774 | 4.076713  |
| C  | 4.099681  | -1.207704 | 4.111670  |
| C  | 4.671524  | -1.644861 | 2.914223  |
| C  | 4.109891  | -1.253304 | 1.697746  |
| C  | 1.189397  | 0.929880  | 2.919767  |
| S  | -0.380210 | -0.056715 | 3.082455  |
| C  | -1.466108 | 1.182512  | 3.881306  |
| C  | 1.705368  | -3.176072 | -0.017001 |
| S  | -0.133468 | -2.952135 | 0.003742  |
| C  | -0.619966 | -3.678127 | -1.599414 |
| C  | 3.117046  | 1.620121  | -0.395076 |
| C  | 4.359609  | 1.917156  | 0.191927  |
| C  | 5.034083  | 3.104998  | -0.096390 |
| C  | 4.470300  | 4.022469  | -0.985109 |
| C  | 3.236719  | 3.742027  | -1.571898 |
| C  | 2.543021  | 2.553236  | -1.292582 |
| C  | 1.202169  | 2.337347  | -1.952127 |
| S  | -0.179637 | 2.846278  | -0.816918 |
| C  | -1.379717 | 3.503006  | -2.032465 |
| Bi | -1.697907 | -0.015409 | 0.019298  |
| Br | -2.013834 | -0.198080 | -2.693399 |
| Br | -3.437814 | 1.980406  | 0.712265  |
| Br | -3.489236 | -1.929239 | 0.711809  |
| H  | -1.647132 | 2.726349  | -2.762692 |
| H  | -0.959103 | 4.391286  | -2.526654 |
| H  | -2.271835 | 3.778240  | -1.454541 |
| H  | -1.599888 | 2.067653  | 3.244278  |
| H  | -1.055906 | 1.457747  | 4.864382  |
| H  | -2.441647 | 0.693787  | 4.011487  |
| H  | -1.716353 | -3.614731 | -1.629162 |
| H  | -0.309249 | -4.732981 | -1.644674 |
| H  | -0.200769 | -3.107671 | -2.439502 |
| H  | 1.034441  | 1.296397  | -2.263096 |
| H  | 1.119208  | 2.971504  | -2.845689 |
| H  | 1.109635  | 1.587913  | 2.043951  |
| H  | 1.243577  | 1.563786  | 3.817132  |
| H  | 2.014197  | -2.789452 | 0.963541  |
| H  | 1.881474  | -4.262370 | -0.004048 |
| H  | 4.810306  | 1.209236  | 0.887950  |
| H  | 5.998854  | 3.309519  | 0.373230  |
| H  | 4.987216  | 4.955427  | -1.220503 |
| H  | 2.791086  | 4.461919  | -2.263069 |
| H  | 4.558369  | -1.598845 | 0.764241  |
| H  | 5.554406  | -2.288032 | 2.924335  |
| H  | 4.527221  | -1.507214 | 5.070951  |



|   |          |           |           |
|---|----------|-----------|-----------|
| H | 2.528617 | -0.040596 | 5.013213  |
| H | 3.930662 | 0.314961  | -2.330878 |
| H | 4.624215 | -1.206681 | -4.138925 |
| H | 3.966136 | -3.624544 | -4.055710 |
| H | 2.638652 | -4.459926 | -2.134957 |

## 2c

59

scf done: -3569.210126

|    |           |           |           |
|----|-----------|-----------|-----------|
| C  | 2.979033  | 2.710485  | -0.579961 |
| C  | 3.446403  | 1.599412  | 0.161338  |
| C  | 4.645773  | 1.719160  | 0.884358  |
| C  | 5.376683  | 2.908728  | 0.881021  |
| C  | 4.917055  | 4.003692  | 0.146463  |
| C  | 3.727562  | 3.897416  | -0.573970 |
| P  | 2.431615  | 0.030850  | 0.189435  |
| C  | 3.180081  | -0.850683 | 1.646101  |
| C  | 2.574963  | -0.722055 | 2.916816  |
| C  | 3.122002  | -1.424737 | 4.003060  |
| C  | 4.251369  | -2.228424 | 3.855213  |
| C  | 4.860827  | -2.341286 | 2.601912  |
| C  | 4.326921  | -1.655048 | 1.511034  |
| C  | 1.350587  | 0.129651  | 3.161190  |
| S  | -0.197315 | -0.881496 | 2.956911  |
| C  | -1.350702 | 0.089189  | 3.997177  |
| C  | 1.681987  | 2.679741  | -1.347600 |
| S  | 0.266878  | 3.023249  | -0.197067 |
| C  | -0.847000 | 3.924419  | -1.335561 |
| C  | 3.062824  | -0.899497 | -1.295830 |
| C  | 3.755685  | -0.197717 | -2.297738 |
| C  | 4.093466  | -0.797186 | -3.513268 |
| C  | 3.750005  | -2.127420 | -3.747373 |
| C  | 3.082659  | -2.844002 | -2.752625 |
| C  | 2.726287  | -2.260372 | -1.526880 |
| C  | 2.023697  | -3.136149 | -0.519857 |
| S  | 0.197058  | -2.909192 | -0.352956 |
| C  | -0.335506 | -3.355407 | -2.041632 |
| Bi | -1.276330 | 0.025825  | 0.057641  |
| I  | -3.336055 | -2.060865 | 0.321441  |
| I  | -1.269602 | 0.305478  | -2.884026 |
| I  | -3.163146 | 2.050160  | 1.139079  |
| H  | -1.077887 | 3.303441  | -2.212729 |
| H  | -0.376507 | 4.873014  | -1.635352 |
| H  | -1.769268 | 4.120151  | -0.772997 |
| H  | -1.396568 | 1.134468  | 3.660838  |
| H  | -1.043710 | 0.023345  | 5.051740  |
| H  | -2.342407 | -0.365375 | 3.864025  |
| H  | -1.427653 | -3.240742 | -2.054901 |
| H  | -0.064732 | -4.402014 | -2.249453 |
| H  | 0.111165  | -2.678364 | -2.782717 |
| H  | 1.496369  | 1.723461  | -1.859133 |
| H  | 1.672312  | 3.470891  | -2.110503 |
| H  | 1.298462  | 1.002035  | 2.494346  |

|   |          |           |           |
|---|----------|-----------|-----------|
| H | 1.346848 | 0.494100  | 4.199050  |
| H | 2.400590 | -2.992331 | 0.500030  |
| H | 2.179034 | -4.195643 | -0.774639 |
| H | 5.018976 | 0.873870  | 1.462315  |
| H | 6.305565 | 2.975491  | 1.451760  |
| H | 5.480321 | 4.939375  | 0.135785  |
| H | 3.360188 | 4.755263  | -1.142785 |
| H | 4.799953 | -1.749109 | 0.531202  |
| H | 5.750211 | -2.962009 | 2.472828  |
| H | 4.656146 | -2.764071 | 4.716501  |
| H | 2.644062 | -1.337869 | 4.982075  |
| H | 4.043670 | 0.839963  | -2.129274 |
| H | 4.628268 | -0.219535 | -4.270294 |
| H | 4.004075 | -2.610498 | -4.693131 |
| H | 2.828422 | -3.892950 | -2.925016 |

**2'a**

60

scf done: -3759.800988

|    |           |           |           |
|----|-----------|-----------|-----------|
| C  | -2.077705 | -0.742786 | 2.465845  |
| C  | -2.754270 | 0.093219  | 1.551889  |
| C  | -3.802950 | 0.897215  | 2.028130  |
| C  | -4.179610 | 0.887977  | 3.371775  |
| C  | -3.503934 | 0.064907  | 4.275708  |
| C  | -2.460369 | -0.736311 | 3.817051  |
| C  | -2.411413 | 0.078549  | 0.055860  |
| C  | -2.814899 | 1.393964  | -0.624657 |
| C  | -2.067984 | 2.576335  | -0.426138 |
| C  | -2.485764 | 3.762954  | -1.050963 |
| C  | -3.630213 | 3.807525  | -1.844651 |
| C  | -4.380789 | 2.643583  | -2.025283 |
| C  | -3.971406 | 1.455199  | -1.419001 |
| C  | -0.820890 | 2.634666  | 0.426076  |
| S  | 0.695730  | 2.605147  | -0.654112 |
| C  | 1.851486  | 3.634212  | 0.331631  |
| C  | -0.917640 | -1.622519 | 2.066792  |
| S  | 0.671121  | -0.743807 | 2.471358  |
| C  | 1.745385  | -2.145196 | 2.962094  |
| C  | -2.997556 | -1.154404 | -0.650061 |
| C  | -4.015240 | -1.907289 | -0.047052 |
| C  | -4.581022 | -3.018944 | -0.678353 |
| C  | -4.135518 | -3.398238 | -1.943680 |
| C  | -3.129783 | -2.652754 | -2.561113 |
| C  | -2.552075 | -1.535068 | -1.939036 |
| C  | -1.475140 | -0.797460 | -2.688773 |
| S  | 0.262665  | -1.276189 | -2.239313 |
| C  | 0.190239  | -3.097389 | -2.138997 |
| Bi | 2.406068  | -0.040569 | -0.153864 |
| Cl | 3.820812  | 1.071854  | -1.963102 |
| Cl | 3.317512  | -2.458344 | -0.238292 |
| Cl | 3.761319  | 0.862074  | 1.824496  |
| H  | 1.840940  | -2.874336 | 2.146078  |
| H  | 1.344525  | -2.610684 | 3.874474  |

|   |           |           |           |
|---|-----------|-----------|-----------|
| H | 2.731935  | -1.704555 | 3.163043  |
| H | 2.011614  | 3.207842  | 1.331857  |
| H | 1.464137  | 4.661669  | 0.393926  |
| H | 2.803974  | 3.621789  | -0.217157 |
| H | 1.187041  | -3.403244 | -1.790790 |
| H | -0.011850 | -3.528861 | -3.130374 |
| H | -0.575149 | -3.423094 | -1.420677 |
| H | -0.923577 | -1.900016 | 1.004749  |
| H | -0.919589 | -2.549946 | 2.657869  |
| H | -0.760328 | 1.828173  | 1.167283  |
| H | -0.783235 | 3.588788  | 0.972309  |
| H | -1.503309 | 0.287665  | -2.520736 |
| H | -1.579604 | -0.968551 | -3.769803 |
| H | -4.336915 | 1.542725  | 1.330372  |
| H | -5.000452 | 1.524408  | 3.709476  |
| H | -3.785154 | 0.048559  | 5.330768  |
| H | -1.916230 | -1.372232 | 4.520033  |
| H | -4.560964 | 0.549570  | -1.566073 |
| H | -5.284673 | 2.657006  | -2.638213 |
| H | -3.934025 | 4.744287  | -2.316383 |
| H | -1.890177 | 4.668405  | -0.909134 |
| H | -4.377650 | -1.618760 | 0.939343  |
| H | -5.371814 | -3.581489 | -0.177325 |
| H | -4.567180 | -4.263374 | -2.451286 |
| H | -2.780531 | -2.939507 | -3.556440 |
| H | -1.317217 | -0.003995 | -0.036702 |

## 2'b

60

scf done: -10101.6291277

|   |           |           |           |
|---|-----------|-----------|-----------|
| C | -2.605814 | -1.225019 | 2.261683  |
| C | -3.296894 | -0.248447 | 1.511608  |
| C | -4.405249 | 0.384511  | 2.097336  |
| C | -4.832767 | 0.066692  | 3.387426  |
| C | -4.149996 | -0.902722 | 4.125217  |
| C | -3.043298 | -1.533015 | 3.559811  |
| C | -2.907882 | 0.062939  | 0.058839  |
| C | -3.344848 | 1.478036  | -0.346521 |
| C | -2.619910 | 2.612844  | 0.078998  |
| C | -3.076692 | 3.891754  | -0.278025 |
| C | -4.236003 | 4.069004  | -1.030697 |
| C | -4.957970 | 2.947892  | -1.446152 |
| C | -4.510991 | 1.670547  | -1.104426 |
| C | -1.337179 | 2.516570  | 0.869036  |
| S | 0.120971  | 2.574968  | -0.294334 |
| C | 1.282363  | 3.649111  | 0.633137  |
| C | -1.364039 | -1.913505 | 1.753355  |
| S | 0.131838  | -0.964733 | 2.334376  |
| C | 1.228009  | -2.316851 | 2.906875  |
| C | -3.435347 | -1.002894 | -0.913877 |
| C | -4.465005 | -1.875712 | -0.532965 |
| C | -4.999643 | -2.813355 | -1.421300 |
| C | -4.512410 | -2.888631 | -2.725618 |

|    |           |           |           |
|----|-----------|-----------|-----------|
| C  | -3.487498 | -2.027001 | -3.118699 |
| C  | -2.935034 | -1.086785 | -2.235073 |
| C  | -1.809195 | -0.229293 | -2.744625 |
| S  | -0.100502 | -0.907311 | -2.404936 |
| C  | -0.339030 | -2.718403 | -2.375102 |
| Bi | 1.952475  | -0.007444 | -0.099103 |
| Br | 3.341315  | 1.402408  | -1.951975 |
| Br | 2.967259  | -2.536079 | -0.412009 |
| Br | 3.335572  | 0.834787  | 2.091722  |
| H  | 1.452035  | -3.011441 | 2.085623  |
| H  | 0.758733  | -2.832040 | 3.757669  |
| H  | 2.158007  | -1.825983 | 3.226387  |
| H  | 1.509319  | 3.221366  | 1.619507  |
| H  | 0.856004  | 4.659041  | 0.720444  |
| H  | 2.203965  | 3.676055  | 0.034205  |
| H  | 0.638728  | -3.124099 | -2.078561 |
| H  | -0.616144 | -3.088970 | -3.372036 |
| H  | -1.103628 | -3.007860 | -1.640978 |
| H  | -1.330421 | -2.006110 | 0.660299  |
| H  | -1.276219 | -2.922915 | 2.178816  |
| H  | -1.273095 | 1.615932  | 1.493056  |
| H  | -1.229685 | 3.386841  | 1.531788  |
| H  | -1.796350 | 0.777857  | -2.307098 |
| H  | -1.882365 | -0.116383 | -3.835187 |
| H  | -4.948602 | 1.139912  | 1.529263  |
| H  | -5.699645 | 0.577244  | 3.812426  |
| H  | -4.472972 | -1.163188 | 5.135331  |
| H  | -2.493207 | -2.280289 | 4.137657  |
| H  | -5.079353 | 0.799887  | -1.433474 |
| H  | -5.869407 | 3.064130  | -2.036552 |
| H  | -4.571450 | 5.074727  | -1.292222 |
| H  | -2.500295 | 4.764198  | 0.040504  |
| H  | -4.863639 | -1.819633 | 0.479724  |
| H  | -5.801096 | -3.477129 | -1.089825 |
| H  | -4.924082 | -3.610490 | -3.434069 |
| H  | -3.098853 | -2.081596 | -4.138843 |
| H  | -1.809854 | 0.033315  | -0.012275 |

2'c

60

scf done: -3266.558607

|   |          |           |           |
|---|----------|-----------|-----------|
| C | 5.006104 | 0.485632  | -1.925669 |
| C | 3.849092 | -0.158907 | -1.461665 |
| C | 3.145322 | -1.003809 | -2.349727 |
| C | 3.627649 | -1.182924 | -3.655507 |
| C | 4.786650 | -0.546962 | -4.098534 |
| C | 5.476296 | 0.297981  | -3.227208 |
| C | 3.401709 | 0.001066  | -0.000673 |
| C | 3.849580 | 1.346151  | 0.591001  |
| C | 3.146350 | 2.537639  | 0.303416  |
| C | 3.628483 | 3.757904  | 0.801959  |
| C | 4.786857 | 3.823159  | 1.575164  |
| C | 5.476105 | 2.645807  | 1.871224  |

|    |           |           |           |
|----|-----------|-----------|-----------|
| C  | 5.006145  | 1.425182  | 1.381953  |
| C  | 1.845118  | 2.544480  | -0.457835 |
| S  | 0.428792  | 2.320277  | 0.742636  |
| C  | -0.621164 | 3.768964  | 0.351894  |
| C  | 1.843697  | -1.666424 | -1.975626 |
| S  | 0.426777  | -0.515478 | -2.381179 |
| C  | -0.621976 | -1.578996 | -3.440854 |
| C  | 3.851988  | -1.183615 | 0.867837  |
| C  | 3.148509  | -1.532282 | 2.042957  |
| C  | 3.631129  | -2.574826 | 2.849187  |
| C  | 4.791075  | -3.274649 | 2.519419  |
| C  | 5.481430  | -2.939296 | 1.353346  |
| C  | 5.010400  | -1.905340 | 0.541368  |
| C  | 1.847683  | -0.876479 | 2.431420  |
| S  | 0.429669  | -1.803417 | 1.639801  |
| C  | -0.617259 | -2.193835 | 3.090694  |
| Bi | -1.594748 | -0.001190 | -0.000161 |
| I  | -2.907078 | -2.625197 | -0.351076 |
| I  | -2.911282 | 1.617093  | -2.093327 |
| I  | -2.907937 | 1.007820  | 2.446802  |
| H  | -0.953460 | -2.468402 | -2.886822 |
| H  | -0.065536 | -1.850881 | -4.349602 |
| H  | -1.497306 | -0.967976 | -3.703186 |
| H  | -0.954420 | 3.733137  | -0.694705 |
| H  | -0.064884 | 4.692249  | 0.569750  |
| H  | -1.495536 | 3.690074  | 1.013454  |
| H  | -1.488423 | -2.733040 | 2.692037  |
| H  | -0.956249 | -1.271262 | 3.582458  |
| H  | -0.057334 | -2.840448 | 3.781878  |
| H  | 1.779620  | -1.950391 | -0.917721 |
| H  | 1.679254  | -2.575642 | -2.569377 |
| H  | 1.781353  | 1.769720  | -1.232171 |
| H  | 1.680445  | 3.513166  | -0.948616 |
| H  | 1.783977  | 0.181448  | 2.147674  |
| H  | 1.684724  | -0.935103 | 3.516003  |
| H  | 5.552752  | 1.147051  | -1.253001 |
| H  | 6.381619  | 0.812799  | -3.556070 |
| H  | 5.143629  | -0.705822 | -5.118256 |
| H  | 3.073357  | -1.832204 | -4.338329 |
| H  | 5.552175  | 0.511707  | 1.619113  |
| H  | 6.380755  | 2.672680  | 2.482518  |
| H  | 5.143646  | 4.785502  | 1.948137  |
| H  | 3.074223  | 4.673954  | 0.581242  |
| H  | 5.557686  | -1.651241 | -0.366761 |
| H  | 6.387707  | -3.479754 | 1.071638  |
| H  | 5.148413  | -4.079255 | 3.165491  |
| H  | 3.076348  | -2.843725 | 3.751917  |
| H  | 2.303635  | -0.000413 | 0.000116  |

# Total energies and Cartesian coordinates at the MP2/cc-pVDZ(-PP) level

1

55

scf done: -2461.6998414

|   |           |           |           |
|---|-----------|-----------|-----------|
| C | 0.275143  | -0.834648 | 2.698641  |
| C | -0.495623 | -0.357028 | 1.617067  |
| C | -1.909934 | -0.270650 | 1.751874  |
| C | -2.503134 | -0.643719 | 2.974879  |
| C | -1.729382 | -1.119624 | 4.048115  |
| C | -0.336485 | -1.220764 | 3.905330  |
| P | 0.245000  | 0.146645  | -0.007091 |
| C | 0.225419  | 1.988857  | 0.217507  |
| C | 0.254324  | 2.796833  | -0.951385 |
| C | 0.243648  | 4.198878  | -0.818013 |
| C | 0.203716  | 4.805761  | 0.449039  |
| C | 0.169702  | 4.006016  | 1.603670  |
| C | 0.184642  | 2.604888  | 1.486702  |
| C | 0.231166  | 2.171384  | -2.325864 |
| S | -1.489525 | 1.649544  | -2.716496 |
| C | -1.127385 | 0.119003  | -3.628948 |
| C | -2.785075 | 0.189990  | 0.613339  |
| S | -3.061912 | -1.118491 | -0.644213 |
| C | -3.993771 | -2.288022 | 0.387360  |
| C | 2.034454  | -0.215469 | 0.310226  |
| C | 2.980273  | 0.776329  | 0.648136  |
| C | 4.336237  | 0.446921  | 0.822011  |
| C | 4.762848  | -0.882505 | 0.669421  |
| C | 3.828290  | -1.875941 | 0.332192  |
| C | 2.468843  | -1.560221 | 0.144389  |
| C | 1.507195  | -2.644293 | -0.277413 |
| S | 1.414492  | -2.670497 | -2.110248 |
| C | -0.181976 | -3.526334 | -2.273318 |
| H | -0.977697 | -2.936089 | -1.788416 |
| H | -0.137390 | -4.538498 | -1.837911 |
| H | -0.397125 | -3.614167 | -3.350466 |
| H | -0.512654 | -0.549610 | -3.003316 |
| H | -0.617346 | 0.331443  | -4.582802 |
| H | -2.096548 | -0.362084 | -3.836817 |
| H | -4.243039 | -3.151777 | -0.249658 |
| H | -4.931297 | -1.835680 | 0.753610  |
| H | -3.391250 | -2.634546 | 1.242967  |
| H | 0.490261  | -2.461703 | 0.113246  |
| H | 1.845036  | -3.628034 | 0.094224  |
| H | 0.868600  | 1.270652  | -2.371631 |
| H | 0.592587  | 2.888090  | -3.083323 |
| H | -2.339075 | 1.025537  | 0.046976  |
| H | -3.767648 | 0.524060  | 0.993069  |
| H | 2.653629  | 1.813817  | 0.775050  |
| H | 5.056240  | 1.230602  | 1.082363  |
| H | 5.816991  | -1.145404 | 0.808181  |
| H | 4.154847  | -2.915269 | 0.205192  |
| H | 0.160387  | 1.981430  | 2.387812  |
| H | 0.135015  | 4.470147  | 2.595528  |

|   |           |           |           |
|---|-----------|-----------|-----------|
| H | 0.192892  | 5.897870  | 0.532628  |
| H | 0.262225  | 4.820561  | -1.721259 |
| H | 1.364733  | -0.894397 | 2.599067  |
| H | 0.278927  | -1.587817 | 4.734182  |
| H | -2.213043 | -1.407236 | 4.987881  |
| H | -3.590939 | -0.554322 | 3.085563  |

1'

56

scf done: -2159.4532997

|   |           |           |           |
|---|-----------|-----------|-----------|
| C | 0.236522  | 0.961886  | 2.764185  |
| C | 0.156092  | 1.110184  | 1.364759  |
| C | -0.248255 | 2.360667  | 0.824202  |
| C | -0.561184 | 3.418599  | 1.702195  |
| C | -0.479837 | 3.261733  | 3.096472  |
| C | -0.081629 | 2.025184  | 3.627903  |
| C | 0.567737  | -0.019732 | 0.427143  |
| C | 1.941422  | 0.236199  | -0.181948 |
| C | 2.298751  | -0.388957 | -1.405067 |
| C | 3.593940  | -0.199176 | -1.926433 |
| C | 4.544683  | 0.577952  | -1.244921 |
| C | 4.193838  | 1.190507  | -0.030574 |
| C | 2.901934  | 1.015536  | 0.494924  |
| C | 1.292515  | -1.178846 | -2.204769 |
| S | 0.432596  | 0.019963  | -3.296317 |
| C | -0.971948 | -1.001265 | -3.833273 |
| C | -0.372900 | 2.575836  | -0.661537 |
| S | -1.914631 | 1.862452  | -1.362686 |
| C | -3.120192 | 2.817693  | -0.392385 |
| C | 0.517446  | -1.374306 | 1.128794  |
| C | 1.698508  | -2.025445 | 1.543467  |
| C | 1.649779  | -3.238648 | 2.250984  |
| C | 0.409412  | -3.818635 | 2.563607  |
| C | -0.771334 | -3.178343 | 2.156611  |
| C | -0.734879 | -1.958241 | 1.451447  |
| C | -2.040059 | -1.341765 | 1.011762  |
| S | -2.597432 | -2.244072 | -0.483286 |
| C | -4.099408 | -1.283536 | -0.837508 |
| H | -3.840746 | -0.227880 | -1.014941 |
| H | -4.820905 | -1.363028 | -0.007307 |
| H | -4.554706 | -1.705615 | -1.747528 |
| H | -1.542505 | -1.349519 | -2.958001 |
| H | -0.631340 | -1.860194 | -4.434778 |
| H | -1.612034 | -0.357169 | -4.457122 |
| H | -4.121987 | 2.502897  | -0.727186 |
| H | -3.010725 | 3.899712  | -0.578924 |
| H | -3.019513 | 2.617876  | 0.687005  |
| H | -1.942672 | -0.271330 | 0.766576  |
| H | -2.804059 | -1.455308 | 1.802402  |
| H | 0.548307  | -1.680666 | -1.562782 |
| H | 1.799263  | -1.946256 | -2.815998 |
| H | 0.438115  | 2.085403  | -1.224964 |
| H | -0.349925 | 3.655156  | -0.896040 |

|   |           |           |           |
|---|-----------|-----------|-----------|
| H | 2.667926  | -1.576767 | 1.304175  |
| H | 2.581330  | -3.725064 | 2.560068  |
| H | 0.360713  | -4.763639 | 3.114985  |
| H | -1.745754 | -3.626165 | 2.386020  |
| H | 2.629515  | 1.493579  | 1.442044  |
| H | 4.923838  | 1.801571  | 0.511335  |
| H | 5.548327  | 0.709433  | -1.663079 |
| H | 3.855157  | -0.672663 | -2.880450 |
| H | 0.554683  | 0.000307  | 3.180744  |
| H | -0.010808 | 1.885803  | 4.712110  |
| H | -0.725245 | 4.098718  | 3.758929  |
| H | -0.863177 | 4.384913  | 1.279877  |
| H | -0.165309 | -0.038090 | -0.400796 |

### BiCl<sub>3</sub>

4

scf done: -1592.6982221

|    |           |           |           |
|----|-----------|-----------|-----------|
| Bi | 0.000000  | 0.000000  | 0.000000  |
| Cl | 0.000000  | 0.000000  | 2.486855  |
| Cl | 2.452040  | 0.000000  | -0.410771 |
| Cl | -0.484006 | -2.405170 | -0.406507 |

### BiBr<sub>3</sub>

4

scf done: -7931.3428346

|    |           |           |           |
|----|-----------|-----------|-----------|
| Bi | 0.000000  | 0.000000  | 0.000000  |
| Br | 0.000000  | 0.000000  | 2.639549  |
| Br | 2.593591  | 0.000000  | -0.490017 |
| Br | -0.591406 | -2.525240 | -0.490201 |

### BiI<sub>3</sub>

4

scf done: -1098.1172152

|    |           |           |           |
|----|-----------|-----------|-----------|
| Bi | -0.023472 | 0.028828  | -0.017785 |
| I  | 0.024638  | -0.029062 | 2.813332  |
| I  | 2.756978  | -0.031293 | -0.552870 |
| I  | -0.679376 | -2.674874 | -0.547574 |

### 2a

59

scf done: -4054.4498924

|   |          |           |           |
|---|----------|-----------|-----------|
| C | 2.954136 | 0.112650  | -2.386300 |
| C | 2.259161 | -0.705825 | -1.465971 |
| C | 2.022224 | -2.072585 | -1.797167 |
| C | 2.495170 | -2.560853 | -3.033659 |
| C | 3.174175 | -1.737634 | -3.945742 |
| C | 3.408791 | -0.394788 | -3.614439 |
| P | 1.505160 | 0.068985  | 0.035845  |
| C | 2.275006 | -0.867805 | 1.430306  |
| C | 1.693874 | -0.778273 | 2.722653  |
| C | 2.283194 | -1.490835 | 3.788164  |
| C | 3.440454 | -2.260724 | 3.598031  |



|    |           |           |           |
|----|-----------|-----------|-----------|
| C  | 4.028922  | -2.329345 | 2.322691  |
| C  | 3.451354  | -1.632201 | 1.249552  |
| C  | 0.451497  | 0.035771  | 3.001150  |
| S  | -1.032451 | -1.032926 | 2.795792  |
| C  | -2.254866 | -0.024660 | 3.697578  |
| C  | 1.319567  | -3.041257 | -0.880293 |
| S  | -0.487954 | -2.795490 | -0.704271 |
| C  | -0.967934 | -2.957462 | -2.449415 |
| C  | 2.471007  | 1.649527  | 0.159373  |
| C  | 3.679375  | 1.731383  | 0.887521  |
| C  | 4.396508  | 2.936575  | 0.956673  |
| C  | 3.918801  | 4.077418  | 0.290034  |
| C  | 2.717657  | 4.004549  | -0.431269 |
| C  | 1.983148  | 2.803574  | -0.510795 |
| C  | 0.672823  | 2.796067  | -1.255957 |
| S  | -0.689762 | 2.976239  | -0.035919 |
| C  | -1.933481 | 3.785268  | -1.091303 |
| Bi | -1.928454 | -0.008564 | -0.088568 |
| Cl | -1.918421 | 0.505475  | -2.597480 |
| Cl | -3.744452 | 1.555762  | 0.822652  |
| Cl | -3.648028 | -1.875352 | -0.213297 |
| H  | -2.156535 | 3.153970  | -1.964616 |
| H  | -1.562631 | 4.775822  | -1.399705 |
| H  | -2.839177 | 3.891027  | -0.477475 |
| H  | -2.320470 | 0.990529  | 3.278146  |
| H  | -1.997335 | 0.004886  | 4.768291  |
| H  | -3.229253 | -0.518914 | 3.561271  |
| H  | -2.061866 | -2.843581 | -2.474902 |
| H  | -0.685798 | -3.957090 | -2.819219 |
| H  | -0.503177 | -2.167474 | -3.058628 |
| H  | 0.510870  | 1.882296  | -1.854928 |
| H  | 0.623296  | 3.662388  | -1.938019 |
| H  | 0.373859  | 0.924429  | 2.349248  |
| H  | 0.462640  | 0.382520  | 4.049624  |
| H  | 1.708110  | -2.995857 | 0.150035  |
| H  | 1.472604  | -4.072407 | -1.246370 |
| H  | 4.059867  | 0.849207  | 1.411560  |
| H  | 5.330608  | 2.980281  | 1.527038  |
| H  | 4.473631  | 5.020396  | 0.337023  |
| H  | 2.333632  | 4.894501  | -0.943813 |
| H  | 3.908709  | -1.682483 | 0.254123  |
| H  | 4.938482  | -2.918775 | 2.163814  |
| H  | 3.881324  | -2.803178 | 4.440907  |
| H  | 1.823508  | -1.433463 | 4.781987  |
| H  | 3.156115  | 1.158462  | -2.133584 |
| H  | 3.944679  | 0.262848  | -4.307134 |
| H  | 3.521004  | -2.145399 | -4.900916 |
| H  | 2.322201  | -3.615355 | -3.280324 |

## 2b

59

scf done: -10393.0956218

|   |          |          |           |
|---|----------|----------|-----------|
| C | 3.303198 | 0.410786 | -2.331808 |
|---|----------|----------|-----------|

|    |           |           |           |
|----|-----------|-----------|-----------|
| C  | 2.622017  | -0.519243 | -1.513041 |
| C  | 2.359015  | -1.825546 | -2.020982 |
| C  | 2.789625  | -2.143725 | -3.326391 |
| C  | 3.452655  | -1.208911 | -4.137153 |
| C  | 3.715603  | 0.072836  | -3.631285 |
| P  | 1.924323  | 0.041990  | 0.107530  |
| C  | 2.724299  | -1.098003 | 1.322722  |
| C  | 2.164331  | -1.229420 | 2.620736  |
| C  | 2.785283  | -2.092633 | 3.548042  |
| C  | 3.951803  | -2.798918 | 3.218562  |
| C  | 4.516713  | -2.652110 | 1.939103  |
| C  | 3.908349  | -1.802390 | 1.001784  |
| C  | 0.905641  | -0.505548 | 3.039441  |
| S  | -0.553141 | -1.532762 | 2.585504  |
| C  | -1.796721 | -0.836700 | 3.721907  |
| C  | 1.672018  | -2.903491 | -1.222734 |
| S  | -0.132308 | -2.681231 | -0.986265 |
| C  | -0.642433 | -2.669869 | -2.729933 |
| C  | 2.918699  | 1.577604  | 0.425406  |
| C  | 4.123974  | 1.550511  | 1.162652  |
| C  | 4.860679  | 2.726301  | 1.379067  |
| C  | 4.406961  | 3.947065  | 0.852380  |
| C  | 3.207940  | 3.982518  | 0.124658  |
| C  | 2.452610  | 2.813340  | -0.099216 |
| C  | 1.141270  | 2.918747  | -0.834388 |
| S  | -0.215355 | 2.950554  | 0.405774  |
| C  | -1.420860 | 3.975753  | -0.493958 |
| Bi | -1.519547 | 0.020867  | 0.022626  |
| Br | -1.616808 | 0.878489  | -2.555304 |
| Br | -3.343055 | 1.555253  | 1.341497  |
| Br | -3.384202 | -1.919101 | -0.202356 |
| H  | -1.678403 | 3.504054  | -1.454467 |
| H  | -1.002362 | 4.983876  | -0.644797 |
| H  | -2.317375 | 4.027808  | 0.140258  |
| H  | -1.874621 | 0.254389  | 3.602903  |
| H  | -1.546809 | -1.107375 | 4.760116  |
| H  | -2.760158 | -1.287479 | 3.436687  |
| H  | -1.735655 | -2.545352 | -2.727517 |
| H  | -0.376050 | -3.632097 | -3.198099 |
| H  | -0.179379 | -1.828878 | -3.268179 |
| H  | 0.967750  | 2.094016  | -1.548605 |
| H  | 1.099608  | 3.867585  | -1.396608 |
| H  | 0.822156  | 0.497069  | 2.582585  |
| H  | 0.893707  | -0.383993 | 4.136815  |
| H  | 2.078359  | -2.989548 | -0.202046 |
| H  | 1.814924  | -3.880168 | -1.719313 |
| H  | 4.487576  | 0.605924  | 1.578247  |
| H  | 5.791759  | 2.684518  | 1.954468  |
| H  | 4.977946  | 4.867486  | 1.013703  |
| H  | 2.841299  | 4.934278  | -0.277766 |
| H  | 4.345946  | -1.685193 | 0.003150  |
| H  | 5.431675  | -3.192319 | 1.672700  |
| H  | 4.417065  | -3.460981 | 3.956324  |

|   |          |           |           |
|---|----------|-----------|-----------|
| H | 2.343231 | -2.205929 | 4.545039  |
| H | 3.529609 | 1.408847  | -1.943361 |
| H | 4.241501 | 0.814104  | -4.242393 |
| H | 3.766408 | -1.484380 | -5.149376 |
| H | 2.596982 | -3.153212 | -3.709290 |

## 2c

59

scf done: -3559.8675777

|    |           |           |           |
|----|-----------|-----------|-----------|
| C  | 2.875152  | 2.769945  | 0.055509  |
| C  | 3.311063  | 1.516262  | 0.562928  |
| C  | 4.500950  | 1.455332  | 1.322561  |
| C  | 5.253085  | 2.614496  | 1.574173  |
| C  | 4.831444  | 3.852044  | 1.060524  |
| C  | 3.646621  | 3.921470  | 0.312093  |
| P  | 2.294575  | 0.005600  | 0.192377  |
| C  | 3.084729  | -1.184883 | 1.366410  |
| C  | 2.508781  | -1.378611 | 2.649229  |
| C  | 3.127718  | -2.273723 | 3.547284  |
| C  | 4.306324  | -2.952608 | 3.203512  |
| C  | 4.884835  | -2.746830 | 1.938251  |
| C  | 4.279486  | -1.863848 | 1.030329  |
| C  | 1.231145  | -0.694048 | 3.074957  |
| S  | -0.202237 | -1.697545 | 2.498754  |
| C  | -1.454397 | -1.204287 | 3.727019  |
| C  | 1.575883  | 2.908558  | -0.694042 |
| S  | 0.200150  | 2.917732  | 0.527554  |
| C  | -0.915869 | 4.100912  | -0.289781 |
| C  | 2.996979  | -0.511739 | -1.442117 |
| C  | 3.694612  | 0.432264  | -2.230170 |
| C  | 4.117585  | 0.123052  | -3.533592 |
| C  | 3.851049  | -1.144007 | -4.073397 |
| C  | 3.172828  | -2.093447 | -3.292592 |
| C  | 2.730168  | -1.803068 | -1.984751 |
| C  | 2.022845  | -2.891731 | -1.220540 |
| S  | 0.211303  | -2.671449 | -1.039488 |
| C  | -0.240824 | -2.669183 | -2.798708 |
| Bi | -1.201688 | 0.017677  | 0.059959  |
| I  | -3.237931 | -2.067208 | -0.183749 |
| I  | -1.357580 | 1.031850  | -2.691520 |
| I  | -3.103590 | 1.640983  | 1.615446  |
| H  | -1.203955 | 3.730040  | -1.285446 |
| H  | -0.418943 | 5.082031  | -0.360422 |
| H  | -1.809650 | 4.177197  | 0.346173  |
| H  | -1.563247 | -0.109914 | 3.761094  |
| H  | -1.185031 | -1.608618 | 4.715910  |
| H  | -2.406090 | -1.642490 | 3.387528  |
| H  | -1.333873 | -2.547564 | -2.837016 |
| H  | 0.042273  | -3.633670 | -3.252713 |
| H  | 0.239698  | -1.831315 | -3.326801 |
| H  | 1.406710  | 2.106046  | -1.434042 |
| H  | 1.548960  | 3.872424  | -1.230771 |
| H  | 1.152399  | 0.337488  | 2.687136  |

|   |          |           |           |
|---|----------|-----------|-----------|
| H | 1.179528 | -0.652107 | 4.176946  |
| H | 2.396543 | -2.989807 | -0.188694 |
| H | 2.180556 | -3.862813 | -1.723811 |
| H | 4.841049 | 0.497988  | 1.728333  |
| H | 6.171614 | 2.546174  | 2.166941  |
| H | 5.415625 | 4.759066  | 1.248320  |
| H | 3.303923 | 4.886462  | -0.079890 |
| H | 4.727426 | -1.700820 | 0.042842  |
| H | 5.808116 | -3.266833 | 1.660568  |
| H | 4.769728 | -3.640259 | 3.918718  |
| H | 2.674495 | -2.434826 | 4.532632  |
| H | 3.927000 | 1.417867  | -1.814475 |
| H | 4.655784 | 0.874853  | -4.120673 |
| H | 4.174122 | -1.397147 | -5.088523 |
| H | 2.978408 | -3.092509 | -3.701166 |

**2'a**

60

scf done: -3752.1860521

|    |           |           |           |
|----|-----------|-----------|-----------|
| C  | -2.014153 | -0.555966 | 2.501837  |
| C  | -2.682606 | 0.242648  | 1.540363  |
| C  | -3.704004 | 1.117684  | 1.969656  |
| C  | -4.049398 | 1.220053  | 3.326779  |
| C  | -3.374999 | 0.439625  | 4.281363  |
| C  | -2.360801 | -0.434031 | 3.863645  |
| C  | -2.371480 | 0.085200  | 0.055304  |
| C  | -2.802686 | 1.321652  | -0.730429 |
| C  | -2.083051 | 2.537494  | -0.602074 |
| C  | -2.515982 | 3.675070  | -1.314918 |
| C  | -3.661800 | 3.637106  | -2.122548 |
| C  | -4.391071 | 2.440791  | -2.228258 |
| C  | -3.963002 | 1.297328  | -1.534350 |
| C  | -0.855094 | 2.671559  | 0.268735  |
| S  | 0.650353  | 2.622968  | -0.789871 |
| C  | 1.805041  | 3.565923  | 0.262680  |
| C  | -0.905234 | -1.511472 | 2.130391  |
| S  | 0.706556  | -0.698813 | 2.493096  |
| C  | 1.726236  | -2.158128 | 2.883509  |
| C  | -2.994487 | -1.190547 | -0.508415 |
| C  | -4.024987 | -1.860596 | 0.182139  |
| C  | -4.641088 | -3.004003 | -0.357115 |
| C  | -4.239178 | -3.490790 | -1.610254 |
| C  | -3.218501 | -2.826043 | -2.310390 |
| C  | -2.590786 | -1.680183 | -1.780553 |
| C  | -1.495491 | -1.024124 | -2.577243 |
| S  | 0.181307  | -1.471157 | -1.982088 |
| C  | 0.131709  | -3.280731 | -2.086658 |
| Bi | 2.404438  | -0.016552 | -0.165476 |
| Cl | 3.812813  | 1.022156  | -1.976967 |
| Cl | 3.348078  | -2.372454 | -0.276590 |
| Cl | 3.821102  | 0.828837  | 1.742261  |
| H  | 1.743082  | -2.868569 | 2.044001  |
| H  | 1.346126  | -2.636177 | 3.800305  |

|   |           |           |           |
|---|-----------|-----------|-----------|
| H | 2.747746  | -1.783911 | 3.052157  |
| H | 1.909302  | 3.108615  | 1.258756  |
| H | 1.459829  | 4.608397  | 0.349341  |
| H | 2.781707  | 3.538617  | -0.245805 |
| H | 1.107470  | -3.624153 | -1.709157 |
| H | 0.007340  | -3.600511 | -3.133929 |
| H | -0.679846 | -3.688725 | -1.464052 |
| H | -0.944900 | -1.829352 | 1.075246  |
| H | -0.959217 | -2.412979 | 2.766098  |
| H | -0.803192 | 1.899360  | 1.053561  |
| H | -0.861644 | 3.658014  | 0.765920  |
| H | -1.533390 | 0.076943  | -2.515074 |
| H | -1.567994 | -1.305612 | -3.642343 |
| H | -4.231261 | 1.726905  | 1.228288  |
| H | -4.845213 | 1.906291  | 3.635498  |
| H | -3.633455 | 0.513581  | 5.342835  |
| H | -1.822064 | -1.039229 | 4.602636  |
| H | -4.532664 | 0.366195  | -1.620059 |
| H | -5.293368 | 2.395396  | -2.847399 |
| H | -3.982816 | 4.533675  | -2.662907 |
| H | -1.940130 | 4.604117  | -1.226554 |
| H | -4.351116 | -1.480596 | 1.155445  |
| H | -5.438469 | -3.505588 | 0.201548  |
| H | -4.714716 | -4.377555 | -2.042213 |
| H | -2.905657 | -3.192839 | -3.295594 |
| H | -1.273857 | -0.012720 | -0.057390 |

## 2'b

60

scf done: -10090.8321715

|   |           |           |           |
|---|-----------|-----------|-----------|
| C | -2.554858 | -0.609082 | 2.478133  |
| C | -3.225346 | 0.198588  | 1.525842  |
| C | -4.274864 | 1.037869  | 1.958568  |
| C | -4.648705 | 1.093855  | 3.310865  |
| C | -3.974996 | 0.301998  | 4.256562  |
| C | -2.931370 | -0.534553 | 3.835388  |
| C | -2.885513 | 0.085208  | 0.043350  |
| C | -3.321615 | 1.335292  | -0.717290 |
| C | -2.612635 | 2.553019  | -0.554734 |
| C | -3.052112 | 3.704997  | -1.239598 |
| C | -4.193591 | 3.677944  | -2.053890 |
| C | -4.910442 | 2.477901  | -2.196170 |
| C | -4.475925 | 1.320436  | -1.529860 |
| C | -1.383597 | 2.667957  | 0.315828  |
| S | 0.124045  | 2.573372  | -0.740761 |
| C | 1.250524  | 3.639928  | 0.219984  |
| C | -1.410450 | -1.519086 | 2.102096  |
| S | 0.172551  | -0.659328 | 2.493971  |
| C | 1.192959  | -2.078319 | 3.011097  |
| C | -3.482788 | -1.181163 | -0.566162 |
| C | -4.525615 | -1.876045 | 0.079438  |
| C | -5.123549 | -3.004547 | -0.509682 |
| C | -4.690799 | -3.449726 | -1.768068 |

|    |           |           |           |
|----|-----------|-----------|-----------|
| C  | -3.655233 | -2.761257 | -2.422166 |
| C  | -3.044748 | -1.631035 | -1.841374 |
| C  | -1.924691 | -0.952269 | -2.582134 |
| S  | -0.271277 | -1.429887 | -1.943361 |
| C  | -0.328841 | -3.233650 | -2.123636 |
| Bi | 1.940350  | 0.006509  | -0.107028 |
| Br | 3.370463  | 1.135421  | -2.066467 |
| Br | 2.996342  | -2.474358 | -0.188148 |
| Br | 3.383548  | 0.994283  | 1.917437  |
| H  | 1.257411  | -2.832144 | 2.212615  |
| H  | 0.776083  | -2.511437 | 3.934353  |
| H  | 2.200168  | -1.679124 | 3.206512  |
| H  | 1.372301  | 3.269486  | 1.249261  |
| H  | 0.868304  | 4.673143  | 0.218567  |
| H  | 2.224679  | 3.601717  | -0.292250 |
| H  | 0.634182  | -3.600530 | -1.735714 |
| H  | -0.427214 | -3.507889 | -3.186567 |
| H  | -1.159394 | -3.660926 | -1.540287 |
| H  | -1.426882 | -1.820408 | 1.041501  |
| H  | -1.437487 | -2.432152 | 2.722451  |
| H  | -1.349571 | 1.904090  | 1.109863  |
| H  | -1.365201 | 3.660184  | 0.800330  |
| H  | -1.960832 | 0.146528  | -2.486326 |
| H  | -1.961423 | -1.199774 | -3.657477 |
| H  | -4.801703 | 1.655524  | 1.223883  |
| H  | -5.466125 | 1.752734  | 3.622717  |
| H  | -4.256309 | 0.339198  | 5.314148  |
| H  | -2.392658 | -1.146993 | 4.568497  |
| H  | -5.036092 | 0.386570  | -1.643754 |
| H  | -5.808183 | 2.440452  | -2.822423 |
| H  | -4.520302 | 4.585544  | -2.571972 |
| H  | -2.485437 | 4.636833  | -1.124548 |
| H  | -4.876162 | -1.527363 | 1.056017  |
| H  | -5.931372 | -3.526674 | 0.014081  |
| H  | -5.152962 | -4.323680 | -2.238931 |
| H  | -3.316515 | -3.097080 | -3.409846 |
| H  | -1.785017 | 0.004728  | -0.052089 |

2'c

60

scf done: -3257.6061170

|   |           |           |           |
|---|-----------|-----------|-----------|
| C | -3.027052 | -1.433912 | 2.063148  |
| C | -3.753647 | -0.381413 | 1.448738  |
| C | -4.882153 | 0.147313  | 2.109704  |
| C | -5.297471 | -0.357989 | 3.353165  |
| C | -4.588850 | -1.413024 | 3.952164  |
| C | -3.455797 | -1.934756 | 3.309390  |
| C | -3.390188 | 0.083313  | 0.041709  |
| C | -3.844485 | 1.518933  | -0.204564 |
| C | -3.093771 | 2.602994  | 0.320041  |
| C | -3.566538 | 3.919494  | 0.144799  |
| C | -4.769706 | 4.176598  | -0.530244 |
| C | -5.511145 | 3.103934  | -1.052970 |

|    |           |           |           |
|----|-----------|-----------|-----------|
| C  | -5.049361 | 1.787202  | -0.887372 |
| C  | -1.769803 | 2.388117  | 1.008078  |
| S  | -0.413417 | 2.387958  | -0.255160 |
| C  | 0.658693  | 3.710796  | 0.395750  |
| C  | -1.749773 | -1.961959 | 1.463132  |
| S  | -0.337797 | -0.959485 | 2.118694  |
| C  | 0.589991  | -2.233434 | 3.029597  |
| C  | -3.952092 | -0.870300 | -1.010704 |
| C  | -5.035101 | -1.723404 | -0.717909 |
| C  | -5.605558 | -2.542242 | -1.709312 |
| C  | -5.101023 | -2.512531 | -3.018339 |
| C  | -4.016335 | -1.671143 | -3.318764 |
| C  | -3.434181 | -0.847563 | -2.334108 |
| C  | -2.238957 | -0.010733 | -2.699027 |
| S  | -0.677933 | -0.782494 | -2.107507 |
| C  | -0.738885 | -2.393223 | -2.940097 |
| Bi | 1.665276  | 0.006851  | -0.076734 |
| I  | 3.231955  | 1.484425  | -2.032770 |
| I  | 2.703743  | -2.708318 | -0.387714 |
| I  | 3.036099  | 0.921496  | 2.304969  |
| H  | 0.934341  | -3.021746 | 2.342603  |
| H  | -0.040586 | -2.645570 | 3.833285  |
| H  | 1.462586  | -1.723096 | 3.465506  |
| H  | 1.014907  | 3.459650  | 1.406693  |
| H  | 0.111673  | 4.666777  | 0.390985  |
| H  | 1.520179  | 3.770061  | -0.287940 |
| H  | 0.166298  | -2.930906 | -2.615797 |
| H  | -0.715259 | -2.260614 | -4.033964 |
| H  | -1.637517 | -2.955204 | -2.640761 |
| H  | -1.728346 | -1.913167 | 0.362159  |
| H  | -1.569317 | -3.007323 | 1.765420  |
| H  | -1.732143 | 1.451893  | 1.588757  |
| H  | -1.552870 | 3.219433  | 1.699904  |
| H  | -2.257396 | 0.990665  | -2.234785 |
| H  | -2.166665 | 0.122452  | -3.792477 |
| H  | -5.441293 | 0.963868  | 1.640957  |
| H  | -6.177188 | 0.067881  | 3.847354  |
| H  | -4.909392 | -1.820315 | 4.916771  |
| H  | -2.890305 | -2.749033 | 3.778820  |
| H  | -5.628767 | 0.951808  | -1.294732 |
| H  | -6.449748 | 3.288620  | -1.586272 |
| H  | -5.122189 | 5.206243  | -0.650925 |
| H  | -2.979641 | 4.753679  | 0.548204  |
| H  | -5.437897 | -1.746867 | 0.299611  |
| H  | -6.446719 | -3.196127 | -1.455529 |
| H  | -5.541338 | -3.141490 | -3.799140 |
| H  | -3.613670 | -1.643371 | -4.338628 |
| H  | -2.289402 | 0.058098  | -0.057328 |

## 7. Literature

- [1] Sheldrick, G. M. *Acta Crystallogr. Sect. A*, **2008**, *64*, 112–122
- [2] Sheldrick, G. M. *Acta Crystallogr. Sect. C*, **2015**, *71*, 3–8.
- [3] Dolomanov, O. V.; Bourhis, L. J.; Gildea, R. J.; Howard, J. A. K.; Puschmann, H. *J. Appl. Crystallogr.* **2009**, *42*, 339–341.
- [4] Vogl, (Ed.: United States Patent 3, 318), **1976**.
- [5a] Gaussian 09, Revision E.01, M. J. Frisch, G. W. Trucks, H. B. Schlegel, G. E. Scuseria, M. A. Robb, J. R. Cheeseman, G. Scalmani, V. Barone, B. Mennucci, G. A. Petersson, H. Nakatsuji, M. Caricato, X. Li, H. P. Hratchian, A. F. Izmaylov, J. Bloino, G. Zheng, J. L. Sonnenberg, M. Hada, M. Ehara, K. Toyota, R. Fukuda, J. Hasegawa, M. Ishida, T. Nakajima, Y. Honda, O. Kitao, H. Nakai, T. Vreven, J. A. Montgomery, Jr., J. E. Peralta, F. Ogliaro, M. Bearpark, J. J. Heyd, E. Brothers, K. N. Kudin, V. N. Staroverov, T. Keith, R. Kobayashi, J. Normand, K. Raghavachari, A. Rendell, J. C. Burant, S. S. Iyengar, J. Tomasi, M. Cossi, N. Rega, J. M. Millam, M. Klene, J. E. Knox, J. B. Cross, V. Bakken, C. Adamo, J. Jaramillo, R. Gomperts, R. E. Stratmann, O. Yazyev, A. J. Austin, R. Cammi, C. Pomelli, J. W. Ochterski, R. L. Martin, K. Morokuma, V. G. Zakrzewski, G. A. Voth, P. Salvador, J. J. Dannenberg, S. Dapprich, A. D. Daniels, O. Farkas, J. B. Foresman, J. V. Ortiz, J. Cioslowski, and D. J. Fox, Gaussian, Inc., Wallingford CT, 2013.
- [5b] 1. G. te Velde, F.M. Bickelhaupt, E.J. Baerends, C. Fonseca Guerra, S.J.A. van Gisbergen, J.G. Snijders and T. Ziegler, *Chemistry with ADF*, *Journal of Computational Chemistry* **22**, 931 (2001)
2. C. Fonseca Guerra, J.G. Snijders, G. te Velde and E.J. Baerends, *Towards an order-N DFT method*, *Theoretical Chemistry Accounts* **99**, 391 (1998).
3. ADF2014, SCM, *Theoretical Chemistry*, Vrije Universiteit, Amsterdam, The Netherlands, <http://www.scm.com>
- E.J. Baerends, T. Ziegler, J. Autschbach, D. Bashford, A. Bérces, F.M. Bickelhaupt, C. Bo, P.M. Boerrigter, L. Cavallo, D.P. Chong, L. Deng, R.M. Dickson, D.E. Ellis, M. van Faassen, L. Fan, T.H. Fischer, C. Fonseca Guerra, M. Franchini, A. Ghysels, A. Giammona, S.J.A. van Gisbergen, A.W. Götz, J.A. Groeneveld, O.V. Gritsenko, M. Grüning, S. Gusarov, F.E. Harris, P. van den Hoek, C.R. Jacob, H. Jacobsen, L. Jensen, J.W. Kaminski, G. van Kessel, F. Kootstra, A. Kovalenko, M.V. Krykunov, E. van Lenthe, D.A. McCormack, A. Michalak, M. Mitoraj, S.M. Morton, J. Neugebauer, V.P. Nicu, L. Noodleman, V.P. Osinga, S. Patchkovskii, M. Pavanello, P.H.T. Philipsen, D. Post, C.C. Pye, W. Ravenek, J.I. Rodríguez, P. Ros, P.R.T. Schipper, H. van Schoot, G. Schreckenbach, J.S. Seldenthuis, M. Seth, J.G. Snijders, M. Solà, M. Swart, D. Swerhone, G. te Velde, P. Vernooijs, L. Versluis, L. Visscher, O. Visser, F. Wang, T.A. Wesolowski, E.M. van Wezenbeek, G. Wiesenekker, S.K. Wolff, T.K. Woo, A.L. Yakovlev.
- [6] a) <https://bse.pnl.gov/bse/portal>
- b) Peterson, K.A. *J. Chem. Phys.* **2003**, *119*, 11099.
- c) Metz, B.; Stoll, H.; Dolg, M.; *J. Chem. Phys.* **2000**, *113*, 2563.
- d) Peterson, K. A.; Shepler, B. C.; Figgen, D.; Stoll, H. *Journal of Physical Chemistry A* **2006**, *110*, 13877.
- [7] NBO Version 3.1 by E. D. Glendening, A. E. Reed, J. E. Carpenter, F. Weinhold
- [8] Lu, T.; Chen, F. *J. Comput. Chem.* **2012**, *33*, 580-592.
- [9] <https://avogadro.cc/>
